# Supplementary material
Source: PubMed Central journal article supplement (PMC7294300)
Supplement: NIHMS1588683-supplement-Supp1.pdf [file NIHMS1588683-supplement-Supp1.pdf]

## CONTENTS

**Appendix 1.** Details of Literature Search

**Appendix 2.** Details of ALE Analysis

**Table S1.** Description of resting-state studies included in the present meta-analysis

**Table S2.** Description of gray matter volume studies included in the present meta-analysis

**Figure S1.** Render of coordinates included in each meta-analytic experiment class

**Table S3.** Contributors to cluster #1 from All Effects analysis

**Table S4.** List of studies included in VBPpos + VMneg (All Patients) grouping

**Table S5.** List of studies included in VBPpos + VMneg (Drug Naïve) grouping

**Table S6.** List of studies included in VBPpos + VMneg (Only MDD) grouping

**Table S7.** List of studies included in VBPpos + VMneg (Naïve+Washout) grouping

**Table S8.** List of studies included in VBPneg (Drug Naïve) grouping

**Table S9.** List of studies included in VBPneg (Only MDD) grouping

**Table S10.** Experiment classes contributing to each grouping tested

**Table S11.** Experiment classes contributing to each cluster identified

**Table S12.** List of experiments contributing to each cluster identified

**References.** Studies included in present meta-analysis

## Appendix 1. Details of Literature Search

Neuroimaging experiments reporting gray matter atrophy (using MRI) or reporting increased or decreased resting-state function (using fMRI, PET, or SPECT) in patients with major depressive disorder (MDD) compared to controls and published between September 1992 and January 2018 were identified by PubMed, Google Scholar, and reference tracing of previous meta-analyses in MDD. Search terms included different combinations of: “voxel-based morphometry”, “VBM”, “gray matter”, “gray matter atrophy”, “gray matter volume”, “gray matter concentration”, “whole-brain”, “resting-state”, “brain function”, “brain activity”, “regional cerebral blood flow”, “rCBF”, “regional homogeneity”, “ReHo”, “amplitude of low frequency fluctuations”, “ALFF/fALFF”, “glucose metabolism”, “arterial spin labeling”, “ASL”, “positron emission tomography”, “PET”, “FDG-PET”, “O-15 PET”, “single photon emission tomography”, “SPECT”, “major depressive disorder”, “MDD”, “major depression”, “depression”, and “unipolar depression”.

The BrainMap voxel-based morphometry database was also queried for qualifying experiments demonstrating reduced gray matter volume in MDD patients relative to controls. Parameters for the BrainMap search included: “Experiments: Contrast is: Gray Matter”, “Subjects: Diagnosis is: Major Depressive Disorder (MDD)”, and “Experiments: Observed Changes is: Controls > Patients”.

General exclusion criteria included: ROI-based or non voxel-wise whole-brain studies, functional or effective connectivity studies, or experiments which reported MDD patients in remission or any other contrast than acutely ill MDD patients vs. healthy controls. Included studies were peer-reviewed, English-language publications- though studies translated from original non-English publications were not excluded. Country of origin for each included study is tabulated in Supplemental Tables 1 & 2 within the Paper field. Distribution of countries of origin included in the present analysis are: 41.9% China, 15% United States, 6.5% Japan, 5.4% United Kingdom, 5.4% Germany, and less than 5% originating from Spain, France, Ireland, Australia, Taiwan, Canada, Israel, South Korea, Brazil, Netherlands, and Denmark.

## Appendix 2. Details of ALE Analysis

### B. Technical Details

(content adapted from [brainmap.org](http://www.brainmap.org) and User Manual for GingerALE available at <http://www.brainmap.org/ale/manual.pdf>)

Activation/anatomical likelihood estimation (ALE) was employed through use of GingerALE 3.0 available through [brainmap.org/ale](http://www.brainmap.org/ale). GingerALE utilizes input foci in either Talairach or MNI format. For the present study, all foci were converted to Talairach space using the Lancaster transform ([www.talairach.org](http://www.talairach.org)).

The ALE methods used in the present work represent the latest generation of CMBA methods, representing many years of progressive refinements and validations. The methods papers for ALE have been published in peer-reviewed journals and have been used in more than 800 peer-reviewed publications ([brainmap.org/publications](http://brainmap.org/publications)).

ALE (as implemented through GingerALE 3.0) models input foci as 3D images for each foci (“experiment”) group. Foci are formatted as 3D Gaussian probability distributions, with the newest format of GingerALE utilizing the variable uncertainty of random effects method by Eickhoff et al 2009, the Full-Width Half-Maximum used to blur each foci group is based on the subject size of each group. This equates to larger subject groups being blurred with a taller, tighter Gaussian functions. This also results in sample size being the greatest determining factor in an individual study’s contribution of overall ALE analysis. ALE generates

Upon computation of a P value image, the remaining step is to select a threshold for significance. The simplest thresholding method would be to use Uncorrected P, though as noted by Eickhoff et al 2012 uncorrected P thresholds are not optimal. For the present study, Cluster-Level Inference thresholding was used to simulate random data sets using the input data set’s number of foci, number of foci groups, and subject sizes. In the case of cluster-level inference, simulated data is thresholded using a “cluster-forming threshold”, in the present study this threshold was set to uncorrected P value of 0.001. GingerALE finds the contiguous volumes above this selected threshold (“clusters”) and tracks the distribution of their volume. The cluster-level inference corrected threshold sets the cluster minimum volume such that only, for example, at a cluster-level inference threshold of 0.05 only 5% of the simulated data’s clusters exceed this size.

### C. Unified ALE Analysis

The following method was used to concatenate foci from different experimental contrasts performed on the same subject group. Examples of this method may be used for combining findings from voxel-based morphometry (VBM) and functional results (such as results from a regional homogeneity analysis, *ReHo*) or combining findings of both increased and decreased brain function as observed through glucose metabolism studies. As ALE operates independently of “sign” of observed effect, though standalone effects are also useful for analysis, this method is useful to evaluate all instances of effect in a unified analysis.

The following example demonstrates data from Qiu et al<sup>37</sup> is formatted for use with GingerALE 3.0

Qiu et al performed three experimental contrasts comparing 12 acute phase MDD patients to 12 healthy control subjects: *VBM* (MDD<HC), *ReHo* (MDD>HC), and *ReHo* (MDD<HC). The foci from each contrast (converted from MNI to Talairach space) are shown below as they would appear if retained for standalone effects analysis.

Contrast 1:

```
// Reference=Talairach
// Qiu H, 2016; GM volume decrease in MDD vs normals, VBM
// Subjects=12
12.36   -.93   43.14
```

Contrast 2:

```
// Reference=Talairach
// Qiu H, 2016: Decreased ReHo regions compared to controls, ReHo
// Subjects=12
-11.88  -41.02  -26.84
  7.49   -52.56  -24.9
  -6.86   -3.83  25.42
   4.84  -18.75  -24.44
```

Contrast 3:

```
// Reference=Talairach
// Qiu H, 2016: Increased ReHo regions compared to controls, ReHo
// Subjects=12
  1.68    8.61   13.23
 54.16  -40.22   20.3
-54.19  -42.97  23.61
 49.09   -0.98   -5.8
-59.4   -32.21    .22
-31.3   -49.04  -30.63
```

To perform a unified all effects analysis utilizing data from all three types of experiments, the data need to be concatenated into a single foci group. The data may not be copied into a single ALE foci file as it appears above, as this would result in the same 12 MDD patients being reported three times (estimating a total of 36 patients instead of 12). The foci may be appended into a single group regardless of “sign” of effect. If desired, GingerALE allows for notes for each foci group as needed, illustrated below.

Unified Contrast:

```
// Reference=Talairach
// Qiu H, 2016; GM volume decrease in MDD vs normals, VBM (1)
// Qiu H, 2016: Decreased ReHo regions compared to controls, ReHo (4)
// Qiu H, 2016: Increased ReHo regions compared to controls, ReHo (6)
// Subjects=12
 12.36   -0.93   43.14
-11.88  -41.02  -26.84
  7.49   -52.56  -24.9
  -6.86   -3.83  25.42
   4.84  -18.75  -24.44
   1.68    8.61   13.23
 54.16  -40.22   20.3
-54.19  -42.97  23.61
 49.09   -0.98   -5.8
-59.4   -32.21    .22
-31.3   -49.04  -30.63
```

Results from GingerALE will report experiments (foci groups) that contribute to any identified clusters; however, unless specific foci information is retained as in the example above, the type of effect contributing to the cluster will not be identifiable. This type of unified analysis is useful for preliminary investigations of effect across all types studies, and specific types of effect (such as increased versus decreased function) may be gleaned from subsequent analyses.

**TABLE S1. Description of resting-state studies included in the present meta-analysis**

| <b>Paper</b>                                                 | <b>Number of subjects: MDD/ Controls</b> | <b>Mean MDD Patient age</b> | <b>Diagnostic criteria used</b> | <b>Technical details</b>                                                                                            | <b>Exclusion criteria for patients / special inclusion details</b>                                                                                                                                                                                                        | <b>Patients medication status</b> | <b>Type of experiment</b> | <b>Reported changes w.r.t controls Increase and/or Decrease</b> |
|--------------------------------------------------------------|------------------------------------------|-----------------------------|---------------------------------|---------------------------------------------------------------------------------------------------------------------|---------------------------------------------------------------------------------------------------------------------------------------------------------------------------------------------------------------------------------------------------------------------------|-----------------------------------|---------------------------|-----------------------------------------------------------------|
| Aihara M et al. <sup>1</sup><br>2007<br><i>Japan</i>         | 24/23                                    | 52.4                        | DSM IV                          | SPM 99 software                                                                                                     | Exclusion of any comorbid Axis I disorder                                                                                                                                                                                                                                 | Medicated                         | FDG PET                   | Both                                                            |
| Bonte FJ et al. <sup>2</sup><br>2001<br><i>United States</i> | 21/18                                    | 11-18                       | DSM III                         | SPM (version not cited) software                                                                                    | Not Specified                                                                                                                                                                                                                                                             | Drug naive                        | Tc99m HMPAO SPECT         | Decrease                                                        |
| Brody AL et al. <sup>3</sup><br>2006<br><i>United States</i> | 24/16                                    | 38.9                        | DSM IV                          | SPM 96 software                                                                                                     | Exclusion of any comorbid Axis I disorder, substance abuse, neurological disorder, use of central nervous system medications, use of any psychotropic medication within 2 weeks of imaging                                                                                | Drug washout                      | FDG PET                   | Both                                                            |
| Cao J et al. <sup>4</sup><br>2016<br><i>China</i>            | 53/47                                    | 21                          | DSM IV                          | Foam padding to minimize head motion, images reviewed by two experienced radiologists for quality, REST version 1.8 | Exclusion of any comorbid Axis I disorder, neurological disease, substance or alcohol abuse, history of electroconvulsive therapy, history of head trauma, psychiatric disease or suicide among 1 <sup>st</sup> degree relatives, other clinically relevant abnormalities | Majority medicated                | ALFF                      | Both                                                            |

| <b>Paper</b>                                                | <b>Number of subjects: MDD/ Controls</b> | <b>Mean MDD Patient age</b> | <b>Diagnostic criteria used</b> | <b>Technical details</b>                                                                 | <b>Exclusion criteria for patients / special inclusion details</b>                                                                                                                                                                                            | <b>Patients medication status</b> | <b>Type of experiment</b> | <b>Reported changes w.r.t controls Increase and/or Decrease</b> |
|-------------------------------------------------------------|------------------------------------------|-----------------------------|---------------------------------|------------------------------------------------------------------------------------------|---------------------------------------------------------------------------------------------------------------------------------------------------------------------------------------------------------------------------------------------------------------|-----------------------------------|---------------------------|-----------------------------------------------------------------|
| Chen G et al. <sup>5</sup><br>2016<br><i>China</i>          | 10/15                                    | 38.9                        | DSM IV                          | Foam padding to reduce head movement, SPM 8 software                                     | Exclusion of comorbid severe mental illness, history of injury with unconsciousness >5 minutes, neurological disorder, serious physical illness, endocrine disease, pregnancy/lactating, current participation in other research study, MRI contraindications | Drug naive                        | ASL                       | Both                                                            |
| Chen JD et al. <sup>6</sup><br>2012<br><i>China</i>         | 46/37                                    | 24                          | DSM IV                          | Subjects' heads were fixed with foam pads and belt, SPM 8 software for motion correction | Exclusion of comorbid major psychiatric illness, major medical illness, neurological disorder, mental retardation, substance abuse, dementia, dementia, pregnancy, MRI abnormalities                                                                          | Drug naive                        | ReHo                      | Both                                                            |
| Drevets WC et al. <sup>7</sup> 1992<br><i>United States</i> | 13/33                                    | 36                          | DSM III                         | Post hoc image comparisons found no significant difference in head placement             | Exclusion of comorbid psychiatric disorders, medical or neurological illness, medications affecting cerebral blood flow, alcohol abuse                                                                                                                        | Drug washout                      | H2O-15 PET                | Both                                                            |

| <b>Paper</b>                                         | <b>Number of subjects: MDD/ Controls</b> | <b>Mean MDD Patient age</b> | <b>Diagnostic criteria used</b> | <b>Technical details</b>                               | <b>Exclusion criteria for patients / special inclusion details</b>                                                                                                                                                                                                                                                                  | <b>Patients medication status</b> | <b>Type of experiment</b> | <b>Reported changes w.r.t controls Increase and/or Decrease</b> |
|------------------------------------------------------|------------------------------------------|-----------------------------|---------------------------------|--------------------------------------------------------|-------------------------------------------------------------------------------------------------------------------------------------------------------------------------------------------------------------------------------------------------------------------------------------------------------------------------------------|-----------------------------------|---------------------------|-----------------------------------------------------------------|
| Du L et al. <sup>8</sup><br>2016<br><i>China</i>     | 16/18                                    | 38.13                       | DSM IV                          | No subject with head motion >2mm or rotation >1 degree | Exclusion of comorbid Axis I or II disorder, alcohol/substance abuse, neurological disease, serious physical illness, morphological brain anomalies, MRI contraindications                                                                                                                                                          | Drug naive                        | ALFF                      | Increase                                                        |
| Duhameau B et al. <sup>9</sup> 2010<br><i>France</i> | 6/6                                      | 52.5                        | DSM IV                          | Over-artifacted images were excluded, SPM 2 software   | Exclusion of comorbid Axis I disorder, personality disorder, suicide risk greater than 2 on item 3 of HDRS, neurological disease, history of significant head injury, severe intercurrent disease, active substance abuse/dependence, history of alcohol or cocaine abuse/dependence, circulatory conditions, MRI contraindications | Medicated                         | ASL                       | Increase                                                        |

| <b>Paper</b>                                                | <b>Number of subjects: MDD/ Controls</b> | <b>Mean MDD Patient age</b> | <b>Diagnostic criteria used</b> | <b>Technical details</b>                                                                                            | <b>Exclusion criteria for patients / special inclusion details</b>                                                                                                                                                                                                                                                             | <b>Patients medication status</b> | <b>Type of experiment</b> | <b>Reported changes w.r.t controls Increase and/or Decrease</b> |
|-------------------------------------------------------------|------------------------------------------|-----------------------------|---------------------------------|---------------------------------------------------------------------------------------------------------------------|--------------------------------------------------------------------------------------------------------------------------------------------------------------------------------------------------------------------------------------------------------------------------------------------------------------------------------|-----------------------------------|---------------------------|-----------------------------------------------------------------|
| Fang J et al. <sup>10</sup> 2015<br><i>China</i>            | 20/18                                    | 59.2                        | DSM IV                          | Timing correction, head motion correction, spatial normalization and smoothing performed by SPM 8 and REST software | Exclusion of comorbid mental disorders, substance/alcohol abuse, severe physical illness, serious infection or surgeries                                                                                                                                                                                                       | Untreated at baseline             | ALFF                      | Decrease                                                        |
| Germain A et al. <sup>11</sup> 2007<br><i>United States</i> | 12/13                                    | 38.1                        | DSM IV                          | SPM 99 software                                                                                                     | Exclusion of comorbid bipolar, schizophrenic, or psychotic disease, high risk for suicide, alcohol/substance abuse, serious physical illness, left handedness, pregnancy/breastfeeding, any current use of mood stabilizer medications, central nervous system stimulants, electroconvulsive therapy within 3 weeks of imaging | Drug washout                      | FDG PET                   | Both                                                            |



| Paper                                               | Number of subjects: MDD/ Controls | Mean MDD Patient age | Diagnostic criteria used | Technical details                                                                                                | Exclusion criteria for patients / special inclusion details                                                                                                                                                                                                                                                     | Patients medication status | Type of experiment | Reported changes w.r.t controls Increase and/or Decrease |
|-----------------------------------------------------|-----------------------------------|----------------------|--------------------------|------------------------------------------------------------------------------------------------------------------|-----------------------------------------------------------------------------------------------------------------------------------------------------------------------------------------------------------------------------------------------------------------------------------------------------------------|----------------------------|--------------------|----------------------------------------------------------|
| Gong Y et al. <sup>12</sup><br>2014<br><i>China</i> | 15/16                             | 15                   | DSM IV                   | Scanner artifacts and gross anatomical abnormalities evaluation through SPM 8 software                           | Exclusion of comorbid schizophrenia, bipolar disorder, personality disorder, or other mental disorder, neurological disease, organic mental disorder, dependence/abuse of psychoactive substances, serious physical illness, history of brain trauma, cerebrovascular disease, pregnancy, MRI contraindications | Drug naive                 | ALFF               | Both                                                     |
| Guo W et al. <sup>13</sup><br>2014<br><i>China</i>  | 44/44                             | 27.52                | DSM IV                   | Foam padding to minimize head motion, structural images check for image artifacts, motion correction with DPARSF | Exclusion of comorbid Axis I disorders, substance abuse/dependence, acute physical illness, history of head injury                                                                                                                                                                                              | Not specified              | ALFF               | Decrease                                                 |

| <b>Paper</b>                                        | <b>Number of subjects: MDD/ Controls</b> | <b>Mean MDD Patient age</b> | <b>Diagnostic criteria used</b> | <b>Technical details</b>                                                             | <b>Exclusion criteria for patients / special inclusion details</b>                                                                                                                                                                                                                                           | <b>Patients medication status</b> | <b>Type of experiment</b> | <b>Reported changes w.r.t controls Increase and/or Decrease</b> |
|-----------------------------------------------------|------------------------------------------|-----------------------------|---------------------------------|--------------------------------------------------------------------------------------|--------------------------------------------------------------------------------------------------------------------------------------------------------------------------------------------------------------------------------------------------------------------------------------------------------------|-----------------------------------|---------------------------|-----------------------------------------------------------------|
| Guo WB et al.<br><sup>14</sup> 2011<br><i>China</i> | 24/19                                    | 27.88                       | DSM IV                          | Foam padding to minimize head movement, correction for head motion in SPM 8 software | Exclusion of comorbid neurological disease, family history of neurological disease, head injury, pregnancy, metallic implants                                                                                                                                                                                | Drug washout                      | ReHo                      | Both                                                            |
| Guo WB et al. <sup>15</sup><br>2012<br><i>China</i> | 45/19                                    | 27.5                        |                                 | Foam padding to minimize head movement, correction for head motion in SPM 8 software | Inclusion of 23 treatment resistant patients, 22 patients with remission after imaging and treatment<br>Exclusion of comorbid psychiatric disorder, injury with loss of consciousness, serious medical illness, substance use disorder within 6 months of imaging, mental retardation, ages outside of 18-60 | Some patients medicated           | ReHo                      | Decrease                                                        |

| Paper                                               | Number of subjects: MDD/ Controls | Mean MDD Patient age | Diagnostic criteria used | Technical details                                                                             | Exclusion criteria for patients / special inclusion details                                                                                                                                                                                                                                               | Patients medication status | Type of experiment | Reported changes w.r.t controls Increase and/or Decrease |
|-----------------------------------------------------|-----------------------------------|----------------------|--------------------------|-----------------------------------------------------------------------------------------------|-----------------------------------------------------------------------------------------------------------------------------------------------------------------------------------------------------------------------------------------------------------------------------------------------------------|----------------------------|--------------------|----------------------------------------------------------|
| Guo WB et al. <sup>16</sup><br>2012<br><i>China</i> | 35/17                             | 27                   | DSM IV                   | SPM 8 software for motion correction                                                          | Inclusion of 18 treatment resistant patients, 17 treatment sensitive patients<br>Exclusion of comorbid bipolar disorder, other comorbid psychiatric disorders, serious medical or neurological illness, mental retardation, history of loss of consciousness, substance abuse within 6 months of scanning | Some patients medicated    | ALFF               | Both                                                     |
| Guo WB et al. <sup>17</sup><br>2013<br><i>China</i> | 30/15                             | EOD 24, LOD 67.5     | DSM IV                   | Subjects heads' were fixed with foam pads and belt, SPM 8 software for head motion correction | Inclusion of 15 early onset patients and 15 late onset patients<br>Exclusion of other comorbid psychiatric disorders, substance abuse/dependence, primary medical illness, neurological disease, cardiovascular disease, dementia, organic brain disorder                                                 | Not specified              | ALFF               | Both                                                     |

| <b>Paper</b>                                           | <b>Number of subjects: MDD/ Controls</b> | <b>Mean MDD Patient age</b> | <b>Diagnostic criteria used</b> | <b>Technical details</b>                         | <b>Exclusion criteria for patients / special inclusion details</b>                                                                                                                                                                                                                                                                                       | <b>Patients medication status</b> | <b>Type of experiment</b> | <b>Reported changes w.r.t controls Increase and/or Decrease</b> |
|--------------------------------------------------------|------------------------------------------|-----------------------------|---------------------------------|--------------------------------------------------|----------------------------------------------------------------------------------------------------------------------------------------------------------------------------------------------------------------------------------------------------------------------------------------------------------------------------------------------------------|-----------------------------------|---------------------------|-----------------------------------------------------------------|
| Ho T et al. <sup>18</sup> 2013<br><i>United States</i> | 25/26                                    | 15.98                       | DSM IV                          | Motion correction through FSL and AFNI           | Inclusion of adolescent population only<br>Exclusion of comorbid psychiatric illness or disruptive disorder                                                                                                                                                                                                                                              | Medicated                         | ASL                       | Both                                                            |
| Huang M et al. <sup>19</sup> 2017<br><i>China</i>      | 25/16                                    | 31.4                        | DSM IV                          | SPM 8 correction for head motion                 | Exclusion of comorbid Axis I or II disorders, previous treatment for depression, significant medical illness, organic brain disease, cerebral trauma, seizure disorder, family history of bipolar disorder, alcohol/substance abuse, pregnancy/lactating, currently in menstrual period, MRI evidence of structural abnormalities, MRI contraindications | Drug naive                        | fALFF                     | Both                                                            |
| Ito H et al. <sup>20</sup> 1996<br><i>Japan</i>        | 11/9                                     | 66.6                        |                                 | Anatomic standardization performed by HBA system | Exclusion of comorbid psychiatric illness, neurological illness, alcohol/substance abuse, use of any cerebral metabolic activator, vasodilator, dopamine agonist, electroconvulsive therapy within 6 months of imaging                                                                                                                                   | Medicated                         | Tc99m HMPAO SPECT         | Decrease                                                        |

| <b>Paper</b>                                                 | <b>Number of subjects: MDD/ Controls</b> | <b>Mean MDD Patient age</b> | <b>Diagnostic criteria used</b> | <b>Technical details</b>                              | <b>Exclusion criteria for patients / special inclusion details</b>                                                                                                                                                                                                               | <b>Patients medication status</b> | <b>Type of experiment</b> | <b>Reported changes w.r.t controls Increase and/or Decrease</b> |
|--------------------------------------------------------------|------------------------------------------|-----------------------------|---------------------------------|-------------------------------------------------------|----------------------------------------------------------------------------------------------------------------------------------------------------------------------------------------------------------------------------------------------------------------------------------|-----------------------------------|---------------------------|-----------------------------------------------------------------|
| Kaichi Y et al. <sup>21</sup> 2016<br><i>Japan</i>           | 53/36                                    | 42.2                        | DSM IV                          | SPM 8 software                                        | Exclusion of comorbid bipolar disorder, neurological illness, serious physical illness, alcohol/substance abuse, likely pregnancy, use of psychotropic medication within 4 weeks of imaging                                                                                      | Drug washout                      | ASL                       | Both                                                            |
| Kegeles LS et al. <sup>22</sup> 2003<br><i>United States</i> | 19/10                                    | 36                          | DSM III                         | Thermoplastic mask utilized to minimize head movement | Exclusion of comorbid DSM-IV disorder, body mass index outside of 20% of age average, recent exposure to antidepressant treatments (no exposure to electroconvulsive therapy within 3 months, fluoxetine within 8 weeks, or any other mood stabilizer within 4 weeks of imaging) | Drug washout                      | FDG PET                   | Decrease                                                        |

| <b>Paper</b>                                                  | <b>Number of subjects: MDD/ Controls</b> | <b>Mean MDD Patient age</b> | <b>Diagnostic criteria used</b> | <b>Technical details</b>                                                | <b>Exclusion criteria for patients / special inclusion details</b>                                                                                                                                                                                                          | <b>Patients medication status</b> | <b>Type of experiment</b> | <b>Reported changes w.r.t controls Increase and/or Decrease</b> |
|---------------------------------------------------------------|------------------------------------------|-----------------------------|---------------------------------|-------------------------------------------------------------------------|-----------------------------------------------------------------------------------------------------------------------------------------------------------------------------------------------------------------------------------------------------------------------------|-----------------------------------|---------------------------|-----------------------------------------------------------------|
| Kennedy SH et al. <sup>23</sup> 2001<br><i>Canada</i>         | 13/24                                    | 36                          | DSM IV                          | Thermoplastic mask utilized to minimize head movement                   | Exclusion of comorbid bipolar disorder, major illness, cardiovascular illness, age outside of 18-50                                                                                                                                                                         | Drug washout                      | FDG PET                   | Both                                                            |
| Kimbrell TA et al. <sup>24</sup> 2002<br><i>United States</i> | 38/37                                    | 43.3                        | DSM IV                          | Head movement restricted by with individually molded thermoplastic mask | Exclusion of psychosis, neurological illness, severe medical illness, history of head trauma, substance abuse, electroconvulsive therapy within 1 year of imaging                                                                                                           | Drug washout                      | FDG PET                   | Both                                                            |
| Kohn Y et al. <sup>25</sup> 2007<br><i>Israel</i>             | 33/25                                    | 53                          | DSV IV                          | Head immobilized                                                        | Inclusion of panic or anxiety disorder diagnosis if proceeding MDD diagnosis<br>Exclusion of Axis I disorder diagnosis preceding MDD diagnosis, neurological illness, history of head injury, alcohol/substance abuse, electroconvulsive therapy within 6 months of imaging | Drug washout                      | Tc99m HMPAO SPECT         | Decrease                                                        |
| Krausz Y et al. <sup>26</sup> 2007<br><i>Israel</i>           | 10/10                                    | 49.1                        | DSM IV                          | SPM 99 software                                                         | Not specified                                                                                                                                                                                                                                                               | Drug washout                      | Tc99m HMPAO SPECT         | Decrease                                                        |

| Paper                                              | Number of subjects: MDD/ Controls | Mean MDD Patient age | Diagnostic criteria used | Technical details                                                                                                                                                         | Exclusion criteria for patients / special inclusion details                                                                                                                                                                                                                                                                          | Patients medication status | Type of experiment | Reported changes w.r.t controls Increase and/or Decrease |
|----------------------------------------------------|-----------------------------------|----------------------|--------------------------|---------------------------------------------------------------------------------------------------------------------------------------------------------------------------|--------------------------------------------------------------------------------------------------------------------------------------------------------------------------------------------------------------------------------------------------------------------------------------------------------------------------------------|----------------------------|--------------------|----------------------------------------------------------|
| Lai CH et al. <sup>27</sup> 2015<br><i>Taiwan</i>  | 44/27                             | 36.9                 | DSM IV                   | All subjects' head movements were less than 0.5mm in translation and one degree in rotation, no subject Demonstrated excessive motion, DPARSF for micro-motion correction | Exclusion of comorbid psychiatric or medical illness, previous CBT or other psychotherapies, alcohol/substance abuse, claustrophobia                                                                                                                                                                                                 | Drug naive                 | fALFF              | Both                                                     |
| Liang MJ et al. <sup>28</sup> 2013<br><i>China</i> | 16/16                             | 36.06                | DSM IV                   | Foam pads used to limit head motion, DPARSF for motion correction and spatial normalization                                                                               | Exclusion of anxiety as a primary diagnosis, comorbid schizophrenia, schizoaffective disorder, substance dependence, serious medical illness, neurological illness, pregnancy/breastfeeding, metallic implants, MRI contraindications, use of caffeine or nicotine, positive urine toxicology, alcohol use within 1 week of imaging, | Medicated                  | ReHo               | Both                                                     |

| Paper                                                      | Number of subjects: MDD/ Controls | Mean MDD Patient age | Diagnostic criteria used | Technical details                                                                                                                            | Exclusion criteria for patients / special inclusion details                                                                                                                                                   | Patients medication status | Type of experiment | Reported changes w.r.t controls Increase and/or Decrease |
|------------------------------------------------------------|-----------------------------------|----------------------|--------------------------|----------------------------------------------------------------------------------------------------------------------------------------------|---------------------------------------------------------------------------------------------------------------------------------------------------------------------------------------------------------------|----------------------------|--------------------|----------------------------------------------------------|
| Liu CH et al. <sup>29</sup><br>2013<br><i>China</i>        | 22/26                             | 36.8                 | DSM IV                   | SPM 8 software for head-motion correction                                                                                                    | Not specified                                                                                                                                                                                                 | Majority medicated         | fAIFF              | Both                                                     |
| Liu J et al. <sup>30</sup><br>2014<br><i>United States</i> | 30/30                             | 29.8                 | DSM IV                   | Head motion was minimized with restraining foam pads, SPM 8 and REST used for motion correction                                              | Exclusion of comorbid Axis I disorders, history of psychopharmacotherapy, history of ECT or psychotherapy, history of head injury, neurological disease, concomitant medical disorders, MRI contraindications | Drug naive                 | ALFF               | Both                                                     |
| Liu Y et al. <sup>31</sup><br>2017<br><i>China</i>         | 23/14                             | 37.7                 | DSM IV                   | Foam pads to minimize head motion, head motion parameters for all participants less than 2.0 mm for translation and 2.0 degrees for rotation | Exclusion of comorbid psychiatric disorders, comorbid physical disease, alcohol/substance abuse, history of discomfort or claustrophobia while undergoing MRI                                                 | Drug naive                 | ReHo               | Both                                                     |



| <b>Paper</b>                                                | <b>Number of subjects: MDD/ Controls</b> | <b>Mean MDD Patient age</b> | <b>Diagnostic criteria used</b> | <b>Technical details</b>                                                                                      | <b>Exclusion criteria for patients / special inclusion details</b>                                                                                                                                                                                                    | <b>Patients medication status</b> | <b>Type of experiment</b> | <b>Reported changes w.r.t controls Increase and/or Decrease</b> |
|-------------------------------------------------------------|------------------------------------------|-----------------------------|---------------------------------|---------------------------------------------------------------------------------------------------------------|-----------------------------------------------------------------------------------------------------------------------------------------------------------------------------------------------------------------------------------------------------------------------|-----------------------------------|---------------------------|-----------------------------------------------------------------|
| Liu Z et al. <sup>32</sup><br>2010<br><i>China</i>          | 15/15                                    | 29.13                       | DSM IV                          | Foam pads to limit head motion, SPM 2 software for head motion correction                                     | Exclusion of comorbid psychiatric disorder, neurological illness, systemic illness, major medical illness, history of head injury                                                                                                                                     | Drug naïve                        | ReHo                      | Both                                                            |
| Lui S et al. <sup>33</sup><br>2009<br><i>China</i>          | 61/42                                    | 34                          | DSM IV                          | Spatial normalization with SPM 2 software                                                                     | Inclusion of 24 refractory depression patients and 37 non refractory depression patients<br>Exclusion of comorbid bipolar disorder, previous psychiatric therapy, major medical illness, use of vasoactive medications, alcohol/substance abuse, age outside of 18-60 | Drug naïve                        | ASL                       | Decrease                                                        |
| Monkul ES et al. <sup>34</sup> 2012<br><i>United States</i> | 20/21                                    | 37.2                        | DSM IV                          | Spatial normalization performed by Convex Hull Spatial Normalization tool and Spatial Normalization algorithm | Exclusion of neurological illness, major physical illness, substance abuse                                                                                                                                                                                            | Drug washout                      | H2O-15 PET                | Both                                                            |

| <b>Paper</b>                                         | <b>Number of subjects: MDD/ Controls</b> | <b>Mean MDD Patient age</b> | <b>Diagnostic criteria used</b> | <b>Technical details</b>           | <b>Exclusion criteria for patients / special inclusion details</b>                                                                                                                                                                                                                                                               | <b>Patients medication status</b> | <b>Type of experiment</b> | <b>Reported changes w.r.t controls Increase and/or Decrease</b> |
|------------------------------------------------------|------------------------------------------|-----------------------------|---------------------------------|------------------------------------|----------------------------------------------------------------------------------------------------------------------------------------------------------------------------------------------------------------------------------------------------------------------------------------------------------------------------------|-----------------------------------|---------------------------|-----------------------------------------------------------------|
| Oda K et al. <sup>35</sup><br>2003<br><i>Japan</i>   | 22/13                                    | 56                          | DSM IV                          | SPM 99 software                    | Inclusion of 12 patients exhibiting white matter hyperintensities and 11 patients without white matter hyperintensities<br>Exclusion of stroke, neurological illness, dementia, psychosis, alcohol/substance abuse, organic brain disease, hyper/hypothyroidism, other significant pathology, previous electroconvulsive therapy | Medicated                         | Tc99m ECD SPECT           | Decrease                                                        |
| Perico CA et al. <sup>36</sup> 2005<br><i>Brazil</i> | 15/15                                    | 34.5                        | DSM IV                          | SPM 99 software                    | Exclusion of neurological illness, cardiovascular illness, history of head trauma, ischemia, use of somatic medication, abnormal MRI results                                                                                                                                                                                     | Washout                           | Tc99m ECD SPECT           | Increase                                                        |
| Qiu H et al. <sup>37</sup><br>2016<br><i>China</i>   | 12/15                                    | 34.4                        | DSM IV                          | Head motion correction with DPARSF | Exclusion of depression caused by or comorbid with somatic disease or other psychiatric disorders, neurological disease, severe somatic disease, substance abuse, pregnancy/lactating                                                                                                                                            | Washout                           | ReHo                      | Both                                                            |

| <b>Paper</b>                                               | <b>Number of subjects: MDD/ Controls</b> | <b>Mean MDD Patient age</b> | <b>Diagnostic criteria used</b> | <b>Technical details</b>                                               | <b>Exclusion criteria for patients / special inclusion details</b>                                                                                                                                                                                                                                             | <b>Patients medication status</b> | <b>Type of experiment</b> | <b>Reported changes w.r.t controls Increase and/or Decrease</b> |
|------------------------------------------------------------|------------------------------------------|-----------------------------|---------------------------------|------------------------------------------------------------------------|----------------------------------------------------------------------------------------------------------------------------------------------------------------------------------------------------------------------------------------------------------------------------------------------------------------|-----------------------------------|---------------------------|-----------------------------------------------------------------|
| Shen T et al. <sup>38</sup><br>2014<br><i>China</i>        | 16/14                                    | 34/4                        | DSM IV                          | Subjects excluded if motion greater than 2.0mm or 2.0 degrees rotation | Exclusion of comorbid Axis I or II disorders, history of psychological treatment, medication within 4 weeks of scanning, medical illness, neurological disease, current suicide attempt, substance dependence aside from nicotine, alcohol consumption within one week of scanning, pregnancy or breastfeeding | Washout                           | fALFF                     | Decrease                                                        |
| Skaf C et al. <sup>39</sup><br>2002<br><i>Brazil</i>       | 21/12                                    | 39                          | DSM IV                          | SPM 96 software                                                        | Inclusion of 12 non-psychotic patients and 9 psychotic patients<br>Exclusion of comorbid mental illness, pregnancy                                                                                                                                                                                             | Washout                           | Tc99m ECD SPECT           | Decrease                                                        |
| Smith GS et al. <sup>40</sup> 2009<br><i>United States</i> | 16/13                                    | 65.3                        | DSM IV                          | SPM 5 software                                                         | Exclusion of comorbid Axis I disorder, neurological illness, or medically unstable                                                                                                                                                                                                                             | Washout                           | FDG PET                   | Both                                                            |

| <b>Paper</b>                                                     | <b>Number of subjects: MDD/ Controls</b> | <b>Mean MDD Patient age</b> | <b>Diagnostic criteria used</b> | <b>Technical details</b>                                                                                                                                                                | <b>Exclusion criteria for patients / special inclusion details</b>                                                                                                                                                                       | <b>Patients medication status</b> | <b>Type of experiment</b> | <b>Reported changes w.r.t controls Increase and/or Decrease</b> |
|------------------------------------------------------------------|------------------------------------------|-----------------------------|---------------------------------|-----------------------------------------------------------------------------------------------------------------------------------------------------------------------------------------|------------------------------------------------------------------------------------------------------------------------------------------------------------------------------------------------------------------------------------------|-----------------------------------|---------------------------|-----------------------------------------------------------------|
| Tadayonnejad R et al. <sup>41</sup> 2015<br><i>United States</i> | 20/25                                    | 54.5                        | DSM IV                          | Artifact Detection Tool (ART) used to measure head motion artifacts, none exceeded more than 2m maximum displacement in x,y, or z axis or 2 degrees angular motion during fMRI scanning | Exclusion of comorbid bipolar disorder, schizophrenia, any psychotic disorder, history of anxiety disorder outside of major depressive episodes, history of head trauma or loss of consciousness, substance abuse, MRI contraindications | Washout                           | ALFF                      | Both                                                            |
| Vardi N et al. <sup>42</sup> 2011<br><i>Israel</i>               | 37/27                                    | 55                          | DSM IV                          | SPM (version not cited) software                                                                                                                                                        | Exclusion of comorbid bipolar disorder, neurological illness, serious physical illness, potential pregnancy, alcohol/substance abuse, outside of 18-55 years old, use of psychotropic medication within 4 weeks of imaging               | Washout                           | Tc99m HMPAO SPECT         | Decrease                                                        |

| Paper                                               | Number of subjects: MDD/ Controls | Mean MDD Patient age | Diagnostic criteria used | Technical details                                                                                                                                                      | Exclusion criteria for patients / special inclusion details                                                                                                                                                                                                                                                                                         | Patients medication status | Type of experiment | Reported changes w.r.t controls Increase and/or Decrease |
|-----------------------------------------------------|-----------------------------------|----------------------|--------------------------|------------------------------------------------------------------------------------------------------------------------------------------------------------------------|-----------------------------------------------------------------------------------------------------------------------------------------------------------------------------------------------------------------------------------------------------------------------------------------------------------------------------------------------------|----------------------------|--------------------|----------------------------------------------------------|
| Wang L et al. <sup>43</sup><br>2012<br><i>China</i> | 18/18                             | 34                   | DSM IV                   | Head motion correction with DPARSF                                                                                                                                     | Exclusion of comorbid bipolar disorder, schizophrenia, schizoaffective, delusional mental disorder, psychotic features coordinated or uncoordinated with mood, organic brain disorder, substance abuse, major physical illness, seizures, brain damage, nervous system disease, acutely suicidal or homicidal behaviors, pregnancy or breastfeeding | Drug naïve                 | ALFF               | Both                                                     |
| Wang L et al. <sup>44</sup><br>2014<br><i>China</i> | 14/14                             | 32.9                 | DSM IV                   | Head motion correction with DPARSF, head motion of all subjects > 1.5 mm maximum displacement in any direction of x, y, and z and 1.5 degrees in any angular dimension | Exclusion of neurological illness, history of head trauma, serious medical illness, current or previous use of antidepressant/antipsychotic medication, previous electroconvulsive therapy, substance abuse within 1 year of imaging, acutely suicidal or homicidal, pregnancy/breastfeeding, age outside of 18-60 years, MRI contraindications     | Drug Naïve                 | ReHo               | Both                                                     |

| <b>Paper</b>                                      | <b>Number of subjects: MDD/ Controls</b> | <b>Mean MDD Patient age</b> | <b>Diagnostic criteria used</b> | <b>Technical details</b>                                                                                                      | <b>Exclusion criteria for patients / special inclusion details</b>                                                                                                                                                                                                                                                                                            | <b>Patients medication status</b> | <b>Type of experiment</b> | <b>Reported changes w.r.t controls Increase and/or Decrease</b> |
|---------------------------------------------------|------------------------------------------|-----------------------------|---------------------------------|-------------------------------------------------------------------------------------------------------------------------------|---------------------------------------------------------------------------------------------------------------------------------------------------------------------------------------------------------------------------------------------------------------------------------------------------------------------------------------------------------------|-----------------------------------|---------------------------|-----------------------------------------------------------------|
| Wang LJ et al. <sup>45</sup> 2014<br><i>China</i> | 56/33                                    | 34                          | DSM IV                          | All subjects with head movement exceeding 1.5 degrees (regardless of rotation) and translation exceeding 1.5 mm were excluded | Inclusion of 26 early treatment responsive patients and 30 early treatment nonresponsive patients<br>Exclusion of comorbid Axis I disorders, organic brain disorder, neurological disease, cardiovascular disease, pregnancy, other physical illness, inability to undergo MRI                                                                                | Drug naïve                        | ALFF                      | Both                                                            |
| Wu QZ et al. <sup>46</sup> 2011<br><i>China</i>   | 44/26                                    | 35                          | DSM IV                          | 9 subjects were excluded for excessive head motion of >1 mm of translation or 1 degree of rotation                            | Inclusion of 22 treatment resistant MDD patients and 22 non-refractory MDD patients<br>Exclusion of comorbid bipolar disorder or other psychiatric illness, renal or major medical illness, cardiovascular illness, history of head trauma, left-handedness, age outside of 18-60 years, psychiatric treatment or substance misuse within 2 months of imaging | Not specified                     | ReHo                      | Both                                                            |

| Paper                                               | Number of subjects: MDD/ Controls | Mean MDD Patient age | Diagnostic criteria used | Technical details                                                                                                            | Exclusion criteria for patients / special inclusion details                                                                                                                                                                                                                                                                                                                                                                                                                                                            | Patients medication status | Type of experiment | Reported changes w.r.t controls Increase and/or Decrease |
|-----------------------------------------------------|-----------------------------------|----------------------|--------------------------|------------------------------------------------------------------------------------------------------------------------------|------------------------------------------------------------------------------------------------------------------------------------------------------------------------------------------------------------------------------------------------------------------------------------------------------------------------------------------------------------------------------------------------------------------------------------------------------------------------------------------------------------------------|----------------------------|--------------------|----------------------------------------------------------|
| Xue S et al. <sup>47</sup> 2016<br><i>China</i>     | 31/31                             | 33.8                 | DSM IV                   | SPM 8 software for head motion correction                                                                                    | Exclusion of comorbid psychotic disorder, other type of personality disorder, brain lesions, substance/tobacco use                                                                                                                                                                                                                                                                                                                                                                                                     | Some patients medicated    | ReHo               | Both                                                     |
| Yamaura T et al. <sup>48</sup> 2016<br><i>Japan</i> | 32/26                             | 44                   | DSM IV                   | Subjects with excessive head motion >1.5 mm translation or 1.5 degrees rotation were excluded, motion correction with DPARSF | Inclusion of 16 treatment resistant patients and 16 non-treatment resistant patients, outpatient status only<br>Exclusion of psychotic MDD, neurological illness, high risk for suicide, left handedness, (for non-TRD patients only):<br>Exclusion of sufficient treatment and duration with one antidepressant to treat the current episode of depression, use of two separate antidepressants for current episode, use of mood stabilizers, antipsychotics or CNS stimulants, ECT within 6 months prior to scanning | Some patients medicated    | fALFF              | Both                                                     |

| <b>Paper</b>                                        | <b>Number of subjects: MDD/ Controls</b> | <b>Mean MDD Patient age</b> | <b>Diagnostic criteria used</b> | <b>Technical details</b>                                                                                                                              | <b>Exclusion criteria for patients / special inclusion details</b>                                                                                                                                                                                                   | <b>Patients medication status</b> | <b>Type of experiment</b> | <b>Reported changes w.r.t controls Increase and/or Decrease</b> |
|-----------------------------------------------------|------------------------------------------|-----------------------------|---------------------------------|-------------------------------------------------------------------------------------------------------------------------------------------------------|----------------------------------------------------------------------------------------------------------------------------------------------------------------------------------------------------------------------------------------------------------------------|-----------------------------------|---------------------------|-----------------------------------------------------------------|
| Yang X et al. <sup>49</sup><br>2015<br><i>China</i> | 50/50                                    | 31.1                        | DSM IV                          | No participants with more than 2mm maximum displacement in x, y, or z and 2 degrees of angular motion during whole scan, SPM 8 software               | Exclusion of comorbid bipolar disorder, schizophrenia, anxiety disorder, neurological disease, use of psychotropic medication within 3 months of scanning, history of loss of consciousness, mental retardation, cardiovascular disease, alcohol/substance abuse     | Washout                           | ReHo                      | Both                                                            |
| Yang Y et al. <sup>50</sup><br>2016<br><i>China</i> | 19/19                                    | 33.8                        | DSM IV                          | Foam padding to limit head motion, patients with movement >3 mm or 3 degrees and healthy subjects exceeding 2mm or 2 degrees excluded, SPM12 software | Exclusion of comorbid Axis I or II disorders, depressive patients with history of manic episode, concurrent serious medical illness, neurological disease, history of head injury resulting in loss of consciousness, alcohol/substance abuse, MRI contraindications | Not specified                     | ALFF                      | Both                                                            |



| <b>Paper</b>                                       | <b>Number of subjects: MDD/ Controls</b> | <b>Mean MDD Patient age</b> | <b>Diagnostic criteria used</b> | <b>Technical details</b>                                                                                                    | <b>Exclusion criteria for patients / special inclusion details</b>                                                                                                                                                                                                                                                                | <b>Patients medication status</b> | <b>Type of experiment</b> | <b>Reported changes w.r.t controls Increase and/or Decrease</b> |
|----------------------------------------------------|------------------------------------------|-----------------------------|---------------------------------|-----------------------------------------------------------------------------------------------------------------------------|-----------------------------------------------------------------------------------------------------------------------------------------------------------------------------------------------------------------------------------------------------------------------------------------------------------------------------------|-----------------------------------|---------------------------|-----------------------------------------------------------------|
| Yao Z et al. <sup>51</sup><br>2009<br><i>China</i> | 22/22                                    | 38.2                        | DSM IV                          | Foam padding to reduce head motion, SPM 2 software for motion correction                                                    | Exclusion of comorbid psychiatric disorder, past electroconvulsive therapy, serious medical illness, family history of serious psychiatric or neurological illness, abnormal clinical labs, acutely suicidal or homicidal, substance abuse, current use of prescription medication, pregnancy/breastfeeding, age outside of 18-55 | Washout                           | ReHo                      | Decrease                                                        |
| Yue Y et al. <sup>52</sup><br>2013<br><i>China</i> | 22/22                                    | 67.5                        | DSM IV                          | Subjects' head fixed with belt and foam pads to minimize head motion, motion effects corrected with SPM 5 and REST software | Exclusion of comorbid major psychiatric disorders, neurodegenerative illness, severe physical or other medical illness causing impaired cognitive function, cardiac or pulmonary disease, substance abuse, MRI contraindications                                                                                                  | Drug naïve                        | ReHo                      | Decrease                                                        |

| <b>Paper</b>                                         | <b>Number of subjects: MDD/ Controls</b> | <b>Mean MDD Patient age</b> | <b>Diagnostic criteria used</b> | <b>Technical details</b>                                                                   | <b>Exclusion criteria for patients / special inclusion details</b>                                                                                                                                                                                                                                                  | <b>Patients medication status</b> | <b>Type of experiment</b> | <b>Reported changes w.r.t controls Increase and/or Decrease</b> |
|------------------------------------------------------|------------------------------------------|-----------------------------|---------------------------------|--------------------------------------------------------------------------------------------|---------------------------------------------------------------------------------------------------------------------------------------------------------------------------------------------------------------------------------------------------------------------------------------------------------------------|-----------------------------------|---------------------------|-----------------------------------------------------------------|
| Zhang K et al. <sup>53</sup><br>2017<br><i>China</i> | 14/14                                    | 33.7                        | DSM IV                          | Foam pads to limit head motion, motion correction with Connectome Computation System (CCS) | Exclusion of neurological disease, other severe disease, left handedness, history of head injury                                                                                                                                                                                                                    | Drug naïve                        | fALFF                     | Decrease                                                        |
| Zhang X et al. <sup>54</sup><br>2016<br><i>China</i> | 32/35                                    | 20.5                        | DSM IV                          | SPM 8 for head motion correction                                                           | Exclusion of current or previous psychiatric disorder (bipolar included), family history of psychotic disorders or personality disorders, previous head trauma with loss of consciousness, persistent headaches, current or previous ECT or psychotropic medications, neurological disease, alcohol/substance abuse | Drug naïve                        | ALFF                      | Both                                                            |
| Zhang X et al. <sup>55</sup><br>2016<br><i>China</i> | 11/11                                    | 34.09                       | ICD 10                          | Pillows to minimize movement, DPARSF and SPM8 for motion correction                        | Exclusion for history of manic episode                                                                                                                                                                                                                                                                              | Some patients medicated           | ALFF                      | Both                                                            |

**TABLE S2. Description of gray matter volume studies included in the present meta-analysis**

| <b>Paper</b>                                                   | <b>Number of subjects MDD/ Controls</b> | <b>Mean age of Patients</b> | <b>Diagnostic criteria used</b> | <b>Technical details</b> | <b>Exclusion/inclusion of psychiatric comorbidity</b>                                                                                                                                                                            | <b>Patients medication status</b>                              |
|----------------------------------------------------------------|-----------------------------------------|-----------------------------|---------------------------------|--------------------------|----------------------------------------------------------------------------------------------------------------------------------------------------------------------------------------------------------------------------------|----------------------------------------------------------------|
| Alemaný S et al. <sup>56</sup><br>2013<br><i>Spain</i>         | 32/21                                   | 36.7                        | DSM IV                          | SPM 8 software           | Exclusion of neurological illness, pregnancy, MRI contraindications                                                                                                                                                              | Some patients medicated                                        |
| Arnone D et al. <sup>57</sup><br>2013<br><i>United Kingdom</i> | 39/66                                   | 36.3                        | DSM IV                          | SPM 8 software           | Exclusion of comorbid Axis I or II disorders, medically unstable, neurological illness, history of head trauma, alcohol/substance abuse, MRI contraindications                                                                   | Drug Naïve                                                     |
| Arnone D et al. <sup>58</sup><br>2009<br><i>United Kingdom</i> | 25/35                                   | 33.2                        | DSM IV                          | SPM 5 software           | Not specified                                                                                                                                                                                                                    | Washout                                                        |
| Begouiganan L et al. <sup>59</sup> 2009<br><i>France</i>       | 21/21                                   | 33.16                       | DSM IV                          | SPM 5 software           | Exclusion of patients with manic episodes, psychotic features, neurological illness, major medical illness, use of medication likely to affect cognition, substance abuse, electroconvulsive therapy within 12 months of imaging | Patients scanned within 1 <sup>st</sup> week of medication use |
| Cai Y et al. <sup>60</sup> 2015<br><i>China</i>                | 23/23                                   | 30                          | DSM IV                          | SPM 8 software           | Exclusion of personal or family history of psychiatric disorders, neurological illness, mental retardation, history of head injury, alcohol/substance abuse, smoking, HAMA>14, BRMS mania >5, MRI contraindications              | Not specified                                                  |
| Chaney A et al. <sup>61</sup><br>2014<br><i>Ireland</i>        | 37/46                                   | 40.6                        | DSM IV                          | SPM 8 software           | Exclusion of neurological disease, history of head injury, substance abuse                                                                                                                                                       | Majority medicated                                             |

| <b>Paper</b>                                            | <b>Number of subjects MDD/ Controls</b> | <b>Mean age of Patients</b> | <b>Diagnostic criteria used</b> | <b>Technical details</b>                                                                                            | <b>Exclusion/inclusion of psychiatric comorbidity</b>                                                                                                                                                               | <b>Patients medication status</b> |
|---------------------------------------------------------|-----------------------------------------|-----------------------------|---------------------------------|---------------------------------------------------------------------------------------------------------------------|---------------------------------------------------------------------------------------------------------------------------------------------------------------------------------------------------------------------|-----------------------------------|
| Cheng YQ et al. <sup>62</sup> 2010<br><i>China</i>      | 68/68                                   | 29.9                        | DSM IV                          | Restraining pads used to minimize head motion, SPM 5 software                                                       | Exclusion of comorbid Axis I disorders, neurological disease, pregnancy, other major illness                                                                                                                        |                                   |
| Fang J et al. <sup>10</sup> 2015<br><i>China</i>        | 20/18                                   | 59.2                        | DSM IV                          | Timing correction, head motion correction, spatial normalization and smoothing performed by SPM 8 and REST software | Exclusion of comorbid mental disorders, substance/alcohol abuse, severe physical illness, serious infection or surgeries                                                                                            | Untreated at baseline             |
| Frodl T et al. <sup>63</sup> 2008<br><i>Ireland</i>     | 38/30                                   | 46.1                        | DSM IV                          | SPM 2 software                                                                                                      | Exclusion of other comorbid mental or personality disorder, neurological disease, alcohol/substance abuse, history of head injury                                                                                   | Medicated                         |
| Gong Q et al. <sup>64</sup> 2011<br><i>China</i>        | 61/42                                   | 40                          | DSM IV                          | SPM 8 software                                                                                                      | Exclusion for previous psychiatric treatment, major physical illness, cardiovascular disease, use of vasoactive medication, alcohol/substance abuse, age outside of 18-60 year                                      | Drug naïve                        |
| Grieve SM et al. <sup>65</sup> 2013<br><i>Australia</i> | 102/34                                  | 33.8                        | DSM IV                          | SPM 8 software                                                                                                      | Exclusion for suicidal tendencies, history of: bipolar disorder, schizophrenia, schizoaffective disorder or psychosis, current anorexia, OCD, PTSD, substance abuse, history of brain injury, MRI contraindications | Washout                           |

| <b>Paper</b>                                                    | <b>Number of subjects MDD/ Controls</b> | <b>Mean age of Patients</b> | <b>Diagnostic criteria used</b> | <b>Technical details</b>                                                                                                                                               | <b>Exclusion/inclusion of psychiatric comorbidity</b>                                                                                            | <b>Patients medication status</b> |
|-----------------------------------------------------------------|-----------------------------------------|-----------------------------|---------------------------------|------------------------------------------------------------------------------------------------------------------------------------------------------------------------|--------------------------------------------------------------------------------------------------------------------------------------------------|-----------------------------------|
| Guo W 2014 et al.<br><sup>13</sup> 2014<br><i>China</i>         | 44/44                                   | 27.5                        | DSM IV                          | Foam padding to minimize head motion, structural images checked for image artifacts, motion correction with Data Processing Assistant for Resting-State fMRI in Matlab | Exclusion of comorbid Axis I disorders, alcohol/substance abuse, acute physical illness, history of head injury                                  | Drug naïve                        |
| Hwang JP et al. <sup>66</sup><br>2010<br><i>Taiwan</i>          | 70/26                                   | 79.4                        | DSM IV                          | SPM 2 software                                                                                                                                                         | Exclusion for onset before age 50, neurological disease                                                                                          | Not specified                     |
| Inkster B et al. <sup>67</sup><br>2011<br><i>United Kingdom</i> | 96/96                                   | 50.4                        | DSM IV                          | Subjects excluded for excessive head motion, SPM 5 software                                                                                                            | Exclusion for comorbid bipolar disorder, mood incongruent, neurological disease, history of head injury or epilepsy, alcohol/substance abuse     | Medicated                         |
| Kim MJ et al. <sup>68</sup> 2008<br><i>United States</i>        | 22/25                                   | 38.5                        | DSM IV                          | Excluded subjects with excessive head motion, SPM 2 software                                                                                                           | Exclusion of comorbid bipolar disorder, social phobia, psychotic disorders, learning disability, history of head trauma, alcohol/substance abuse | Medicated                         |
| Lai, CH et al. <sup>69</sup> 2015<br><i>Taiwan</i>              | 53/54                                   | 40                          | DSM IV                          | FSL and FSLVBM software                                                                                                                                                | Exclusion of comorbid psychiatric or medical illness, previous CBT psychotherapy, alcohol/substance abuse, MRI contraindications                 | Drug naïve                        |
| Lee HY et al. <sup>70</sup> 2011<br><i>South Korea</i>          | 47/51                                   | 46                          | DSM IV                          | SPM 2 software                                                                                                                                                         | Not specified                                                                                                                                    | Medicated                         |

| <b>Paper</b>                                          | <b>Number of subjects MDD/ Controls</b> | <b>Mean age of Patients</b> | <b>Diagnostic criteria used</b> | <b>Technical details</b>                                    | <b>Exclusion/inclusion of psychiatric comorbidity</b>                                                                                                                                        | <b>Patients medication status</b> |
|-------------------------------------------------------|-----------------------------------------|-----------------------------|---------------------------------|-------------------------------------------------------------|----------------------------------------------------------------------------------------------------------------------------------------------------------------------------------------------|-----------------------------------|
| Li CT et al. <sup>71</sup> 2010<br><i>Taiwan</i>      | 48/25                                   | 44                          | DSM IV                          | SPM 2 software                                              | Exclusion of comorbid psychiatric or personality disorder, alcohol/substance abuse                                                                                                           | Not specified                     |
| Liu CH et al. <sup>72</sup> 2014<br><i>China</i>      | 19/19                                   | 35                          | DSM IV                          | SPM 8 software                                              | Exclusion of comorbid DSM-IV psychiatric disorders, neurological disease, patient in imminent danger, pregnancy/breastfeeding, MRI contraindications                                         | Medicated                         |
| Machino A et al. <sup>73</sup> 2014<br><i>Japan</i>   | 29/29                                   | 39.57                       | DSM IV                          | SPM 8 software                                              | Exclusion of comorbid personality disorder, psychotic spectrum disorders, organic brain disorder, mental retardation, current high risk for suicide, severe somatic disease, substance abuse | Medicated                         |
| Mak AK et al. <sup>74</sup> 2009<br><i>China</i>      | 17/17                                   | 45.5                        | ICD 10                          | SPM 2 software                                              | Exclusion of comorbid psychiatric illness, neurological disease, mental retardation, alcohol abuse                                                                                           | Medicated                         |
| Peng J et al. <sup>75</sup> 2011<br><i>China</i>      | 20/30                                   | 46.7                        | DSM IV                          | Foam padding to stabilize head position, SPM 2 software     | Exclusion of comorbid psychiatric illness, neurological disease, history of head trauma                                                                                                      | Majority unmediated               |
| Perico CAM et al. <sup>76</sup> 2011<br><i>Brazil</i> | 20/94                                   | 29.9                        | DSM IV                          | Subjects excluded for excessive head motion, SPM 2 software | Exclusion of neurological or central nervous system disorders, history of head injury, MRI contraindications                                                                                 | Majority medicated                |
| Qiu H et al. <sup>37</sup> 2016<br><i>China</i>       | 12/15                                   | 34/4                        | DSM IV                          | Head motion correction with DPARSF                          | Exclusion of depression caused by or combined with somatic disease or other psychiatric disorders, neurological disease, severe somatic disease, pregnancy/lactating, substance abuse        | Washout                           |

| <b>Paper</b>                                                     | <b>Number of subjects MDD/ Controls</b> | <b>Mean age of Patients</b> | <b>Diagnostic criteria used</b> | <b>Technical details</b>                                                                             | <b>Exclusion/inclusion of psychiatric comorbidity</b>                                                                                                                           | <b>Patients medication status</b>      |
|------------------------------------------------------------------|-----------------------------------------|-----------------------------|---------------------------------|------------------------------------------------------------------------------------------------------|---------------------------------------------------------------------------------------------------------------------------------------------------------------------------------|----------------------------------------|
| Redlich R et al. <sup>77</sup><br>2014<br><i>Germany</i>         | 58/58                                   | 37.6                        | DSM IV                          | VBM 8 software                                                                                       | Exclusion of comorbid lifetime mental disorders, dementia, psychotic episodes                                                                                                   | Medicated                              |
| Salvadore G et al. <sup>78</sup><br>2011<br><i>United States</i> | 58/107                                  | 38.8                        | DSM IV                          | Images visually checked for artifacts, SPM 5 software                                                | Exclusion of suicidal ideation, neurological disease, exposure to psychotropic medication within 3 weeks of study, pregnancy/breastfeeding, alcohol/substance abuse             | Washout                                |
| Scheuerecker J et al. <sup>79</sup> 2010<br><i>Germany</i>       | 13/15                                   | 37.9                        | DSM IV                          | VBM 5 toolbox                                                                                        | Exclusion of comorbid mental or personality disorder, use of cortisol medication, neurological disease, pregnancy, history of head injury, alcohol/substance abuse              | Washout                                |
| Serra-Blasco M et al. <sup>80</sup> 2013<br><i>Spain</i>         | 22/32                                   | 49                          | DSM IV                          | SPM 8 software                                                                                       | Exclusion of comorbid Axis I disorder                                                                                                                                           | Medicated                              |
| Shad MU et al. <sup>81</sup><br>2012<br><i>United States</i>     | 22/22                                   | 15                          | DSM IV                          | Subjects' heads immobilized with tightly-fitting foam pad with strap across forehead, SPM 5 software | Exclusion of current or prior history of mania, hypomania, schizophrenia, schizoaffective disorder, autism, family history of bipolar disorder, substance use disorder symptoms | Majority drug naïve, remaining washout |
| Shah PJ et al. <sup>82</sup><br>1998<br><i>United Kingdom</i>    | 20/20                                   | 48.9                        | DSM IV                          | SPM 96 software                                                                                      | Exclusion of history of manic episodes, neurological disease, hypothyroidism, use of steroids, history of head injury, alcohol/substance abuse                                  | Medicated                              |
| Smith GS et al. <sup>40</sup><br>2009<br><i>United States</i>    | 16/13                                   | 65                          | DSM IV                          | SPM 5 software                                                                                       | Exclusion of comorbid Axis I disorder, neurological disease, medically unstable                                                                                                 | Washout                                |

| <b>Paper</b>                                                     | <b>Number of subjects MDD/ Controls</b> | <b>Mean age of Patients</b> | <b>Diagnostic criteria used</b> | <b>Technical details</b>                                             | <b>Exclusion/inclusion of psychiatric comorbidity</b>                                                                                                                                                                      | <b>Patients medication status</b> |
|------------------------------------------------------------------|-----------------------------------------|-----------------------------|---------------------------------|----------------------------------------------------------------------|----------------------------------------------------------------------------------------------------------------------------------------------------------------------------------------------------------------------------|-----------------------------------|
| Soriano-Mas C et al. <sup>83</sup> 2011<br><i>Spain</i>          | 70/40                                   | 61.5                        | DSM IV                          | SPM 2 software                                                       | Exclusion of present or past comorbid Axis I disorders, neurological disease, abnormal MRI results                                                                                                                         | Medicated                         |
| Stratmann M et al. <sup>84</sup> 2014<br><i>Germany</i>          | 132/132                                 | 37.86                       | DSM IV                          | Images visually inspected for artifacts, SPM 8 software              | Exclusion of comorbid Axis I or II disorder (other than anxiety disorder), neurological or neurodegenerative disease, serious medical illness, history of head injury, MRI contraindications                               | Medicated                         |
| Tang Y et al. <sup>85</sup> 2007<br><i>China</i>                 | 14/13                                   | 29.5                        | DSM IV                          | Head motion was minimized with restraining foam pads, SPM 5 software | Exclusion of major medical illness, neurological disease, history of head injury, alcohol/substance abuse                                                                                                                  | Drug naïve                        |
| van Eijndhoven P et al. <sup>86</sup> 2013<br><i>Netherlands</i> | 20/31                                   | 34.1                        | DSM IV                          | FreeSurfer software                                                  | Exclusion of comorbid Axis I disorder, postpartum depression, pregnancy/breastfeeding, menopause, history of traumatic brain injury, metal in body, claustrophobia, substance abuse                                        | Drug naïve                        |
| van Tol MJ et al. <sup>87</sup> 2010<br><i>Netherlands</i>       | 68/65                                   | 37.1                        | DSM IV                          | SPM 5 software                                                       | Exclusion of known comorbid personality disorders (but not screened for), exposure to psychotropic medication within 48 hours of study, neurological disease, hypertension, alcohol/substance abuse, MRI contraindications | Washout                           |
| van Tol MJ et al. <sup>88</sup> 2014<br><i>Netherlands</i>       | 20/20                                   | 38.25                       | ICD 10                          | CIVET processing                                                     | Exclusion of atypical depression, bipolar disorder, major medical illness, history of seizures, alcohol abuse, MRI contraindications                                                                                       | Medicated                         |



| <b>Paper</b>                                             | <b>Number of subjects MDD/ Controls</b> | <b>Mean age of Patients</b> | <b>Diagnostic criteria used</b> | <b>Technical details</b>                                                                                                                        | <b>Exclusion/inclusion of psychiatric comorbidity</b>                                                                                                                                                                                                                      | <b>Patients medication status</b> |
|----------------------------------------------------------|-----------------------------------------|-----------------------------|---------------------------------|-------------------------------------------------------------------------------------------------------------------------------------------------|----------------------------------------------------------------------------------------------------------------------------------------------------------------------------------------------------------------------------------------------------------------------------|-----------------------------------|
| Vasic N et al. <sup>89</sup> 2008<br><i>Germany</i>      | 15/14                                   | 37.4                        | DSM IV                          | SPM 5 software                                                                                                                                  | Exclusion of comorbid Axis I disorders, neurological disease, family history of mood disorders, substance abuse                                                                                                                                                            | Medicated                         |
| Wagner G et al. <sup>90</sup> 2011<br><i>Germany</i>     | 30/30                                   | 37                          | DSM IV                          | Head immobilization was established by pads, SPM 2 software                                                                                     | Exclusion of comorbid Axis I disorders, history of manic episodes, past or current neurological disease                                                                                                                                                                    | Not specified                     |
| Yang X et al. <sup>49</sup> 2011<br><i>China</i>         | 50/50                                   | 31.12                       | DSM IV                          | No participants with more than 2mm maximum displacement in x, y, or z and 2 degrees of angular motion during the whole MRI scan, SPM 8 software | Exclusion of use of psychotropic medication within 3 months of scanning, schizophrenia, bipolar disorder, neurological disease, history of loss of consciousness, mental retardation, cardiovascular disease, alcohol/substance abuse                                      | Washout                           |
| Zhang X et al. <sup>91</sup> 2012<br><i>China</i>        | 33/32                                   | 20.52                       | DSM IV                          | Foam pads used to reduce head motion, SPM 8 software                                                                                            | Exclusion of current or previous comorbid psychiatric disorder, comorbid personality disorder, neurological disease, history of head trauma, persistent headache, alcohol/substance abuse, current or previous electroconvulsive therapy or use of psychotropic medication | Drug naive                        |
| Zou K et al. <sup>92</sup> 2010<br><i>United Kingdom</i> | 23/23                                   | 31.1                        | DSM IV                          | SPM 2 software                                                                                                                                  | Exclusion of comorbid Axis I or II disorders                                                                                                                                                                                                                               | Drug naïve                        |

**FIGURE S1. Render of coordinates included in each meta-analytic experiment class**

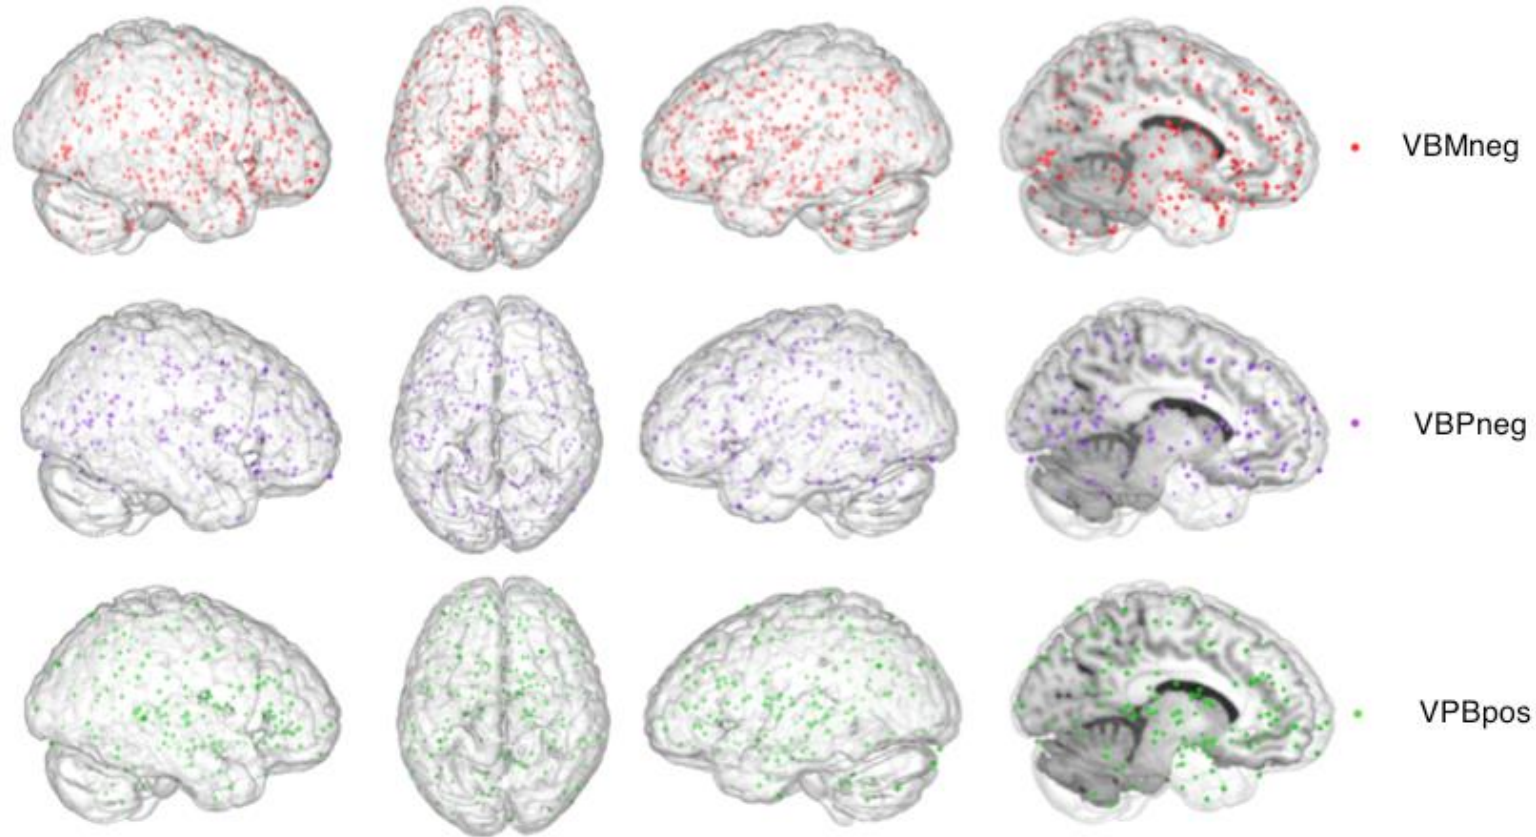

Major meta-analytic subgroupings for this study comprised decreased gray matter volume in patients compared to controls, increased and decreased function relative to controls. Red coordinates indicate reported locations of decreased gray matter volume (VBMneg) in major depressive disorder (MDD) patients, purple indicates reported locations of decreased function (VBPneg in MDD, and green indicates reported locations of increased function (VBPpos) in MDD. Color transparency indicates depth of coordinate with respect to cortical surface.

**TABLE S3. Contributors to cluster #1 from All Effects analysis**

| <b>Paper</b>                             | <b>Experiment type and reported changes (MDD relative to control subjects)</b> |
|------------------------------------------|--------------------------------------------------------------------------------|
| Arnone D et al. <sup>57</sup> 2013       | VBM decreases                                                                  |
| Germain A et al. <sup>11</sup> 2007      | FDG-PET increases & decreases                                                  |
| Huang M et al. <sup>19</sup> 2017        | fALFF increases & decreases                                                    |
| Lee HY et al. <sup>70</sup> 2011         | VBM decreases                                                                  |
| Shah PJ et al. <sup>82</sup> 1998        | VBM decreases                                                                  |
| Tadayonnejad R et al. <sup>41</sup> 2015 | ALFF increases & decreases                                                     |
| Yang Y et al. <sup>50</sup> 2016         | ALFF increases & decreases                                                     |
| Zou K et al. <sup>92</sup> 2010          | VBM decreases                                                                  |

**TABLE S4. List of studies included in VBPos + VBMneg (All Patients) grouping**

| <b>Paper/Experiment details</b>                                        | <b>Number of depressed Subjects</b> | <b>Imaging Modality</b> |
|------------------------------------------------------------------------|-------------------------------------|-------------------------|
| Aihara M et al. <sup>1</sup> 2007                                      | 24                                  | FDG-PET                 |
| Alemanly S et al. <sup>56</sup> 2013                                   | 12                                  | VBM                     |
| Arnone D et al. <sup>58</sup> 2009                                     | 25                                  | VBM                     |
| Arnone D et al. <sup>57</sup> 2013                                     | 39                                  | VBM                     |
| Begouiganan L et al. <sup>59</sup> 2009                                | 21                                  | VBM                     |
| Brody AL et al. <sup>3</sup> 2001                                      | 16                                  | FDG-PET                 |
| Cai Y et al. <sup>60</sup> 2015                                        | 23                                  | VBM                     |
| Cao J et al. <sup>4</sup> 2016<br>( <i>suicidal MDD</i> )              | 35                                  | ALFF                    |
| Cao J et al. <sup>4</sup> 2016<br>( <i>non-suicidal MDD</i> )          | 18                                  | ALFF                    |
| Chaney A et al. <sup>61</sup> 2014                                     | 10                                  | VBM                     |
| Chen G et al. <sup>5</sup> 2016                                        | 10                                  | ASL                     |
| Chen JD et al. <sup>6</sup> 2012<br>( <i>late onset MDD</i> )          | 15                                  | ReHo                    |
| Chen JD et al. <sup>6</sup> 2012<br>( <i>early onset MDD</i> )         | 15                                  | ReHo                    |
| Cheng YQ et al. <sup>62</sup> 2010                                     | 68                                  | VBM                     |
| Drevets WC et al. <sup>7</sup> 1992                                    | 13                                  | O-15 PET                |
| Du L et al. <sup>8</sup> 2016                                          | 16                                  | ALFF                    |
| Duhameau B et al. <sup>9</sup> 2010                                    | 6                                   | ASL                     |
| Fang J et al. <sup>10</sup> 2015                                       | 20                                  | VBM                     |
| Zou K et al. <sup>92</sup> 2010                                        | 30                                  | VBM                     |
| Germain A et al. <sup>11</sup> 2007                                    | 12                                  | FDG-PET                 |
| Gong Q et al. <sup>64</sup> 2011                                       | 23                                  | VBM                     |
| Gong Y et al. <sup>12</sup> 2014                                       | 15                                  | ALFF                    |
| Grieve SM et al. <sup>65</sup> 2013                                    | 34                                  | VBM                     |
| Guo W et al. <sup>13</sup> 2014<br>( <i>first episode MDD</i> )        | 24                                  | VBM                     |
| Guo W et al. <sup>13</sup> 2014<br>( <i>recurrent MDD</i> )            | 21                                  | VBM                     |
| Guo WB et al. <sup>14</sup> 2011                                       | 24                                  | ReHo                    |
| Guo WB et al. <sup>16</sup> 2012<br>( <i>treatment resistant MDD</i> ) | 18                                  | ALFF                    |
| Guo WB et al. <sup>16</sup> 2012<br>( <i>treatment sensitive MDD</i> ) | 17                                  | ALFF                    |
| Guo WB et al. <sup>17</sup> 2013<br>( <i>early onset MDD</i> )         | 15                                  | ALFF                    |
| Guo WB et al. <sup>17</sup> 2013<br>( <i>late onset MDD</i> )          | 15                                  | ALFF                    |
| Ho T et al. <sup>18</sup> 2013                                         | 25                                  | ASL                     |
| Huang M et al. <sup>19</sup> 2017                                      | 25                                  | fALFF                   |
| Hwang JP et al. <sup>66</sup> 2010                                     | 16                                  | VBM                     |
| Inkster B et al. <sup>67</sup> 2011                                    | 49                                  | VBM                     |
| Kaichi Y et al. <sup>21</sup> 2016                                     | 53                                  | ASL                     |
| Kennedy SH et al. <sup>23</sup> 2001                                   | 13                                  | FDG-PET                 |
| Kim MJ et al. <sup>68</sup> 2008                                       | 22                                  | VBM                     |

| Paper/Experiment details                                                  | Number of depressed Subjects | Imaging Modality |
|---------------------------------------------------------------------------|------------------------------|------------------|
| Kimbrell TA et al. <sup>24</sup> 2002                                     | 37                           | FDG-PET          |
| Lai CH et al. <sup>27</sup> 2015                                          | 44                           | fALFF            |
| Lee HY et al. <sup>70</sup> 2011                                          | 47                           | VBM              |
| Li CT et al. <sup>71</sup> 2010                                           | 25                           | VBM              |
| Liang MJ et al. <sup>28</sup> 2013                                        | 16                           | ReHo             |
| Liu CH et al. <sup>29</sup> 2013                                          | 22                           | fALFF            |
| Liu CH et al. <sup>72</sup> 2014                                          | 19                           | VBM              |
| Liu J et al. <sup>30</sup> 2014                                           | 30                           | ALFF             |
| Liu Y et al. <sup>31</sup> 2017                                           | 23                           | ReHo             |
| Liu Z et al. <sup>32</sup> 2010                                           | 45                           | ReHo             |
| Lui S et al. <sup>33</sup> 2009                                           | 37                           | ASL              |
| Machino A et al. <sup>73</sup> 2012                                       | 29                           | VBM              |
| Mak AK et al. <sup>74</sup> 2009                                          | 17                           | VBM              |
| Monkul ES et al. <sup>34</sup> 2011                                       | 20                           | O-15 PET         |
| Peng J et al. <sup>75</sup> 2010                                          | 22                           | VBM              |
| Perico CA et al. <sup>36</sup> 2005                                       | 15                           | Tc-99m SPECT     |
| Perico CAM et al. <sup>76</sup> 2011                                      | 20                           | VBM              |
| Qiu H et al. <sup>37</sup> 2016                                           | 12                           | ReHo             |
| Redlich R et al. <sup>77</sup> 2014                                       | 58                           | VBM              |
| Salvadore G et al. <sup>78</sup> 2011                                     | 58                           | VBM              |
| Scheuerecker J et al. <sup>79</sup> 2010                                  | 13                           | VBM              |
| Serra-Blasco M et al. <sup>80</sup> 2013                                  | 22                           | VBM              |
| Shad MU et al. <sup>81</sup> 2012                                         | 22                           | VBM              |
| Shah PJ et al. <sup>82</sup> 1998                                         | 20                           | VBM              |
| Smith GS et al. <sup>40</sup> 2009                                        | 16                           | FDG-PET          |
| Soriano-Mas C et al. <sup>83</sup> 2011                                   | 40                           | VBM              |
| Stratmann M et al. <sup>84</sup> 2014                                     | 132                          | VBM              |
| Tadayonnejad R et al. <sup>41</sup> 2015                                  | 20                           | ALFF             |
| Tang Y et al. <sup>85</sup> 2007                                          | 14                           | VBM              |
| van Eijndhoven P et al. <sup>86</sup> 2013                                | 20                           | VBM              |
| van Tol MJ et al. <sup>87</sup> 2010                                      | 65                           | VBM              |
| van Tol MJ et al. <sup>88</sup> 2014                                      | 20                           | VBM              |
| Vasic N et al. <sup>89</sup> 2008                                         | 15                           | VBM              |
| Wagner G et al. <sup>90</sup> 2011                                        | 30                           | VBM              |
| Wang L et al. <sup>43</sup> 2012                                          | 18                           | ALFF             |
| Wang L et al. <sup>44</sup> 2014                                          | 14                           | ReHo             |
| Wang LJ et al. <sup>45</sup> 2014<br>(early treatment responsive MDD)     | 26                           | ALFF             |
| Wang LJ et al. <sup>45</sup> 2014<br>(early treatment non-responsive MDD) | 30                           | ALFF             |
| Wu QZ et al. <sup>46</sup> 2010<br>(non-refractory MDD)                   | 22                           | ReHo             |
| Wu QZ et al. <sup>46</sup> 2010<br>(treatment resistant MDD)              | 22                           | ReHo             |
| Xue S et al. <sup>47</sup> 2016                                           | 31                           | ReHo             |
| Yamaura T et al. <sup>48</sup> 2016<br>(treatment resistant MDD)          | 16                           | fALFF            |
| Yamaura T et al. <sup>48</sup> 2016<br>(non-treatment resistant MDD)      | 16                           | fALFF            |
| Yang X et al. <sup>49</sup> 2015                                          | 50                           | ReHo             |
| Yang Y et al. <sup>50</sup> 2016                                          | 19                           | ALFF             |

| <b>Paper/Experiment details</b>                                                     | <b>Number of depressed Subjects</b> | <b>Imaging Modality</b> |
|-------------------------------------------------------------------------------------|-------------------------------------|-------------------------|
| Zhang X et al. <sup>91</sup> 2012                                                   | 32                                  | VBM                     |
| Zhang X et al. <sup>54</sup> 2016<br><i>(imbalanced spontaneous brain activity)</i> | 32                                  | ALFF                    |
| Zhang X et al. <sup>54</sup> 2016<br><i>(females only)</i>                          | 11                                  | ALFF                    |
| Zou K et al. <sup>92</sup> 2010                                                     | 23                                  | VBM                     |

Experiments: 86

Subjects: 2,254

Foci: 497

**TABLE S5. List of studies included in VBPpos +VBMneg (Drug Naïve) grouping**

| Paper/Experiment details                                                              | Number of depressed Subjects | Imaging Modality |
|---------------------------------------------------------------------------------------|------------------------------|------------------|
| Arnone D et al. <sup>58</sup> 2009                                                    | 25                           | VBM              |
| Chen G et al. <sup>5</sup> 2016                                                       | 10                           | ASL*             |
| Chen JD et al. <sup>6</sup> 2012<br>( <i>late onset MDD</i> )                         | 15                           | ReHo*            |
| Chen JD et al. <sup>6</sup> 2012<br>( <i>early onset MDD</i> )                        | 15                           | ReHo*            |
| Cheng YQ et al. <sup>62</sup> 2010                                                    | 68                           | VBM              |
| Du L et al. <sup>8</sup> 2016                                                         | 16                           | ALFF*            |
| Gong Q et al. <sup>64</sup> 2011                                                      | 23                           | VBM              |
| Gong Y et al. <sup>12</sup> 2014                                                      | 15                           | ALFF*            |
| Grieve SM et al. <sup>65</sup> 2013                                                   | 34                           | VBM              |
| Guo W et al. <sup>13</sup> 2014<br>( <i>first episode MDD</i> )                       | 24                           | VBM              |
| Guo W et al. <sup>13</sup> 2014<br>( <i>recurrent MDD</i> )                           | 21                           | VBM              |
| Huang M et al. <sup>19</sup> 2017                                                     | 25                           | fALFF*           |
| Lai CH et al. <sup>27</sup> 2015                                                      | 44                           | fALFF*           |
| Liu J et al. <sup>30</sup> 2014                                                       | 30                           | ALFF*            |
| Liu Y et al. <sup>31</sup> 2017                                                       | 23                           | ReHo*            |
| Liu Z et al. <sup>32</sup> 2010                                                       | 45                           | ReHo             |
| Lui S et al. <sup>33</sup> 2009                                                       | 37                           | ASL              |
| Tang Y et al. <sup>85</sup> 2007                                                      | 14                           | VBM              |
| van Eijndhoven P et al. <sup>86</sup> 2013                                            | 20                           | VBM              |
| Wang L et al. <sup>43</sup> 2012                                                      | 18                           | ALFF*            |
| Wang L et al. <sup>44</sup> 2014                                                      | 14                           | ReHo*            |
| Wang LJ et al. <sup>45</sup> 2014<br>( <i>early treatment responsive MDD</i> )        | 26                           | ALFF*            |
| Wang LJ et al. <sup>45</sup> 2014<br>( <i>early treatment non-responsive MDD</i> )    | 30                           | ALFF*            |
| Zhang X et al. <sup>54</sup> 2016<br>( <i>imbalanced spontaneous brain activity</i> ) | 32                           | ALFF*            |
| Zhang X et al. <sup>54</sup> 2016<br>( <i>females only</i> )                          | 11                           | ALFF*            |
| Zou K et al. <sup>92</sup> 2010                                                       | 23                           | VBM*             |

Experiments: 26

Subjects: 693

Foci: 131

\*= First Episode patient groups, n=16

**TABLE S6. List of studies included in VBPos +VBMneg (Only MDD) grouping**

| Paper/Experiment details                                                           | Number of depressed Subjects | Imaging Modality |
|------------------------------------------------------------------------------------|------------------------------|------------------|
| Aihara M et al. <sup>1</sup> 2007                                                  | 24                           | FDG-PET          |
| Aleman S et al. <sup>56</sup> 2013                                                 | 12                           | VBM              |
| Brody AL et al. <sup>3</sup> 2001                                                  | 16                           | FDG-PET          |
| Cao J et al. <sup>4</sup> 2016<br>( <i>suicidal MDD</i> )                          | 35                           | ALFF             |
| Cao J et al. <sup>4</sup> 2016<br>( <i>non-suicidal MDD</i> )                      | 18                           | ALFF             |
| Chen G et al. <sup>5</sup> 2016                                                    | 10                           | ASL              |
| Cheng YQ et al. <sup>62</sup> 2010                                                 | 68                           | VBM              |
| Du L et al. <sup>8</sup> 2016                                                      | 16                           | ALFF             |
| Duhameau B et al. <sup>9</sup> 2010                                                | 6                            | ASL              |
| Fang J et al. <sup>10</sup> 2015                                                   | 20                           | VBM              |
| Frodl T et al. <sup>63</sup> 2008                                                  | 30                           | VBM              |
| Germain A et al. <sup>11</sup> 2007                                                | 12                           | FDG-PET          |
| Gong Y et al. <sup>12</sup> 2014                                                   | 15                           | ALFF             |
| Guo W et al. <sup>13</sup> 2014<br>( <i>first episode MDD</i> )                    | 24                           | VBM              |
| Guo W et al. <sup>13</sup> 2014<br>( <i>recurrent MDD</i> )                        | 21                           | VBM              |
| Guo WB et al. <sup>17</sup> 2013<br>( <i>early onset MDD</i> )                     | 15                           | ALFF             |
| Guo WB et al. <sup>17</sup> 2013<br>( <i>late onset MDD</i> )                      | 15                           | ALFF             |
| Ho T et al. <sup>18</sup> 2013                                                     | 25                           | ASL              |
| Huang M et al. <sup>19</sup> 2017                                                  | 25                           | fALFF            |
| Lai CH et al. <sup>27</sup> 2015                                                   | 44                           | fALFF            |
| Li CT et al. <sup>71</sup> 2010                                                    | 25                           | VBM              |
| Liu CH et al. <sup>72</sup> 2014                                                   | 19                           | VBM              |
| Liu J et al. <sup>30</sup> 2014                                                    | 30                           | ALFF             |
| Liu Y et al. <sup>31</sup> 2017                                                    | 23                           | ReHo             |
| Liu Z et al. <sup>32</sup> 2010                                                    | 45                           | ReHo             |
| Mak AK et al. <sup>74</sup> 2009                                                   | 17                           | VBM              |
| Peng J et al. <sup>75</sup> 2010                                                   | 22                           | VBM              |
| Redlich R et al. <sup>77</sup> 2014                                                | 58                           | VBM              |
| Serra-Blasco M et al. <sup>80</sup> 2013                                           | 22                           | VBM              |
| Smith GS et al. <sup>40</sup> 2009                                                 | 16                           | FDG-PET          |
| Soriano-Mas C et al. <sup>83</sup> 2011                                            | 40                           | VBM              |
| Stratmann M et al. <sup>84</sup> 2014                                              | 132                          | VBM              |
| Tadayonnejad R et al. <sup>41</sup> 2015                                           | 20                           | ALFF             |
| van Eijndhoven P et al. <sup>86</sup> 2013                                         | 20                           | VBM              |
| Vasic N et al. <sup>89</sup> 2008                                                  | 15                           | VBM              |
| Wagner G et al. <sup>90</sup> 2011                                                 | 30                           | VBM              |
| Wang LJ et al. <sup>45</sup> 2014<br>( <i>early treatment responsive MDD</i> )     | 26                           | ALFF             |
| Wang LJ et al. <sup>45</sup> 2014<br>( <i>early treatment non-responsive MDD</i> ) | 30                           | ALFF             |



| <b>Paper/Experiment details</b>                                       | <b>Number of depressed Subjects</b> | <b>Imaging Modality</b> |
|-----------------------------------------------------------------------|-------------------------------------|-------------------------|
| Wu QZ et al. <sup>46</sup> 2010<br>( <i>non-refractory MDD</i> )      | 22                                  | ReHo                    |
| Wu QZ et al. <sup>46</sup> 2010<br>( <i>treatment resistant MDD</i> ) | 22                                  | ReHo                    |
| Yang Y et al. <sup>50</sup> 2016                                      | 19                                  | ALFF                    |
| Zhang X et al. <sup>91</sup> 2012                                     | 32                                  | VBM                     |
| Zou K et al. <sup>92</sup> 2010                                       | 23                                  | VBM                     |

Experiments: 43

Subjects: 1,186

Foci: 271

**TABLE S7. List of studies included in VBPpos +VBMneg (Naïve+Washout) grouping**

| Paper/Experiment details                                                           | Number of depressed Subjects | Imaging Modality |
|------------------------------------------------------------------------------------|------------------------------|------------------|
| Arnone D et al. <sup>57</sup> 2013                                                 | 39                           | VBM              |
| Brody AL et al. <sup>3</sup> 2001                                                  | 16                           | FDG-PET          |
| Chen G et al. <sup>5</sup> 2016                                                    | 10                           | ASL              |
| Chen JD et al. <sup>6</sup> 2012<br>( <i>late onset MDD</i> )                      | 15                           | ReHo             |
| Chen JD et al. <sup>6</sup> 2012<br>( <i>early onset MDD</i> )                     | 15                           | ReHo             |
| Cheng YQ et al. <sup>62</sup> 2010                                                 | 68                           | VBM              |
| Drevets WC et al. <sup>7</sup> 1992                                                | 13                           | O-15 PET         |
| Du L et al. <sup>8</sup> 2016                                                      | 16                           | ALFF             |
| Fang J et al. <sup>10</sup> 2015                                                   | 20                           | VBM              |
| Germain A et al. <sup>11</sup> 2007                                                | 12                           | FDG-PET          |
| Gong Q et al. <sup>64</sup> 2011                                                   | 23                           | VBM              |
| Gong Y et al. <sup>12</sup> 2014                                                   | 15                           | ALFF             |
| Grieve SM et al. <sup>65</sup> 2013                                                | 34                           | VBM              |
| Guo W et al. <sup>13</sup> 2014<br>( <i>first episode MDD</i> )                    | 24                           | VBM              |
| Guo W et al. <sup>13</sup> 2014<br>( <i>recurrent MDD</i> )                        | 21                           | VBM              |
| Huang M et al. <sup>19</sup> 2017                                                  | 25                           | fALFF            |
| Kaichi Y et al. <sup>21</sup> 2016                                                 | 53                           | ASL              |
| Kennedy SH et al. <sup>23</sup> 2001                                               | 13                           | FDG-PET          |
| Kimbrell TA et al. <sup>24</sup> 2002                                              | 37                           | FDG-PET          |
| Lai CH et al. <sup>27</sup> 2015                                                   | 44                           | fALFF            |
| Liang MJ et al. <sup>28</sup> 2013                                                 | 16                           | ReHo             |
| Liu J et al. <sup>30</sup> 2014                                                    | 30                           | ALFF             |
| Liu Y et al. <sup>31</sup> 2017                                                    | 23                           | ReHo             |
| Liu Z et al. <sup>32</sup> 2010                                                    | 45                           | ReHo             |
| Lui S et al. <sup>33</sup> 2009                                                    | 37                           | ASL              |
| Monkul ES et al. <sup>34</sup> 2011                                                | 20                           | O-15 PET         |
| Perico CA et al. <sup>36</sup> 2005                                                | 15                           | Tc-99m SPECT     |
| Qiu H et al. <sup>37</sup> 2016                                                    | 12                           | ReHo             |
| Salvadore G et al. <sup>78</sup> 2011                                              | 58                           | VBM              |
| Scheuerecker J et al. <sup>79</sup> 2010                                           | 13                           | VBM              |
| Smith GS et al. <sup>40</sup> 2009                                                 | 16                           | FDG-PET          |
| Tang Y et al. <sup>85</sup> 2007                                                   | 14                           | VBM              |
| van Eijndhoven P et al. <sup>86</sup> 2013                                         | 20                           | VBM              |
| van Tol MJ et al. <sup>87</sup> 2010                                               | 65                           | VBM              |
| Wang L et al. <sup>43</sup> 2012                                                   | 18                           | ALFF             |
| Wang L et al. <sup>44</sup> 2014                                                   | 14                           | ReHo             |
| Wang LJ et al. <sup>45</sup> 2014<br>( <i>early treatment responsive MDD</i> )     | 26                           | ALFF             |
| Wang LJ et al. <sup>45</sup> 2014<br>( <i>early treatment non-responsive MDD</i> ) | 30                           | ALFF             |
| Yang X et al. <sup>49</sup> 2015                                                   | 50                           | ReHo             |
| Zhang X et al. <sup>91</sup> 2012                                                  | 32                           | VBM              |

| Paper/Experiment details                                                            | Number of depressed Subjects | Imaging Modality |
|-------------------------------------------------------------------------------------|------------------------------|------------------|
| Zhang X et al. <sup>54</sup> 2016<br><i>(imbalanced spontaneous brain activity)</i> | 32                           | ALFF             |
| Zou K et al. <sup>92</sup> 2010                                                     | 23                           | VBM              |

Experiments: 42

Subjects: 1,122

Foci: 212

**TABLE S8. List of studies included in VBPneg (Drug Naïve) grouping**

| Paper/Experiment details                                                     | Number of depressed Subjects | Imaging Modality |
|------------------------------------------------------------------------------|------------------------------|------------------|
| Bonte FJ et al. <sup>2</sup> 2001<br>(with frontal deficits)                 | 13                           | FDG-PET          |
| Bonte FJ et al. <sup>2</sup> 2001<br>(with occipital deficits)               | 8                            | FDG-PET          |
| Chen G et al. <sup>5</sup> 2016                                              | 10                           | ASL*             |
| Chen JD et al. <sup>6</sup> 2012<br>(late onset MDD)                         | 15                           | ReHo*            |
| Chen JD et al. <sup>6</sup> 2012<br>(early onset MDD)                        | 15                           | ReHo*            |
| Gong Y et al. <sup>12</sup> 2014                                             | 15                           | ALFF*            |
| Huang M et al. <sup>19</sup> 2017                                            | 25                           | fALFF*           |
| Lai CH et al. <sup>27</sup> 2015                                             | 44                           | fALFF            |
| Liu J et al. <sup>30</sup> 2014                                              | 30                           | ALFF             |
| Liu Y et al. <sup>31</sup> 2017                                              | 23                           | ReHo*            |
| Liu Z et al. <sup>32</sup> 2010                                              | 45                           | ReHo*            |
| Lui S et al. <sup>33</sup> 2009<br>(non-refractory MDD)                      | 37                           | ASL              |
| Lui S et al. <sup>33</sup> 2009<br>(refractory MDD)                          | 24                           | ASL              |
| Wang L et al. <sup>43</sup> 2012                                             | 18                           | ALFF*            |
| Wang L et al. <sup>44</sup> 2014                                             | 14                           | ReHo*            |
| Wang LJ et al. <sup>45</sup> 2014<br>(early treatment responsive MDD)        | 26                           | ALFF*            |
| Wang LJ et al. <sup>45</sup> 2014<br>(early treatment non-responsive MDD)    | 30                           | ALFF*            |
| Yue Y et al. <sup>52</sup> 2013<br>(late onset MDD)                          | 22                           | ReHo             |
| Zhang K et al. <sup>53</sup> 2017                                            | 14                           | fALFF*           |
| Zhang X et al. <sup>54</sup> 2016<br>(imbalanced spontaneous brain activity) | 32                           | ALFF*            |

Experiments: 20

Subjects: 460

Foci: 67

\*= First episode patient groups, n=12

**TABLE S9. List of studies included in VBPneg (Only MDD) grouping**

| Paper/Experiment details                                                           | Number of depressed Subjects | Imaging Modality  |
|------------------------------------------------------------------------------------|------------------------------|-------------------|
| Aihara M et al. <sup>1</sup> 2007                                                  | 24                           | FDG-PET           |
| Brody AL et al. <sup>3</sup> 2001                                                  | 16                           | FDG-PET           |
| Cao J et al. <sup>4</sup> 2016<br>( <i>suicidal MDD</i> )                          | 35                           | ALFF              |
| Cao J et al. <sup>4</sup> 2016<br>( <i>non-suicidal MDD</i> )                      | 18                           | ALFF              |
| Chen G et al. <sup>5</sup> 2016                                                    | 10                           | ASL               |
| Fang J et al. <sup>10</sup> 2015                                                   | 20                           | ALFF              |
| Germain A et al. <sup>11</sup> 2007                                                | 12                           | FDG-PET           |
| Gong Y et al. <sup>12</sup> 2014                                                   | 15                           | ALFF              |
| Guo W et al. <sup>13</sup> 2014                                                    | 44                           | ALFF              |
| Ho T et al. <sup>18</sup> 2013                                                     | 25                           | ASL               |
| Huang M et al. <sup>19</sup> 2017                                                  | 25                           | fALFF             |
| Ito H et al. <sup>20</sup> 1996                                                    | 11                           | Tc99m HMPAO SPECT |
| Kohn Y et al. <sup>25</sup> 2007                                                   | 33                           | Tc99m HMPAO SPECT |
| Lai CH et al. <sup>27</sup> 2015                                                   | 44                           | fALFF             |
| Liu J et al. <sup>30</sup> 2014                                                    | 30                           | ALFF              |
| Liu Y et al. <sup>31</sup> 2017                                                    | 23                           | ReHo              |
| Liu Z et al. <sup>32</sup> 2010                                                    | 45                           | ReHo              |
| Shen T et al. <sup>38</sup> 2014                                                   | 16                           | fALFF             |
| Smith GS et al. <sup>40</sup> 2009                                                 | 16                           | FDG-PET           |
| Tadayonnejad R et al. <sup>41</sup> 2015                                           | 20                           | ALFF              |
| Wang LJ et al. <sup>45</sup> 2014<br>( <i>early treatment responsive MDD</i> )     | 26                           | ALFF              |
| Wang LJ et al. <sup>45</sup> 2014<br>( <i>early treatment non-responsive MDD</i> ) | 30                           | ALFF              |
| Wu QZ et al. <sup>46</sup> 2010<br>( <i>non-refractory MDD</i> )                   | 22                           | ReHo              |
| Wu QZ et al. <sup>46</sup> 2010<br>( <i>treatment resistant MDD</i> )              | 22                           | ReHo              |
| Yang Y et al. <sup>50</sup> 2016                                                   | 19                           | ALFF              |
| Yao Z et al. <sup>51</sup> 2009                                                    | 22                           | ReHo              |
| Yue Y et al. <sup>52</sup> 2013<br>( <i>late onset MDD</i> )                       | 22                           | ReHo              |

Experiments: 27

Subjects: 710

Foci: 118

**TABLE S10. Experiment classes contributing to each grouping tested\* \*\***

| Grouping tested                 | % contribution to each grouping |        |       |                    |        |        |
|---------------------------------|---------------------------------|--------|-------|--------------------|--------|--------|
|                                 | VBM                             | ALFF   | fALFF | Glucose Metabolism | rCBF   | ReHo   |
| VBPpos + VBMneg (all patients)  | 45.45%                          | 18.6%  | 5.81% | 6.98%              | 9.3%   | 13.95% |
| VBPpos + VBMneg (drug naïve)    | 34.62%                          | 30.77% | 7.69% | 0%                 | 7.69%  | 19.23% |
| VBPpos + VBMneg (only MDD)      | 44.19%                          | 25.58% | 4.65% | 9.3%               | 6.98%  | 9.3%   |
| VBPpos + VBMneg (naïve+washout) | 33.33%                          | 16.67% | 4.76% | 11.9%              | 14.29% | 19.05% |
| VBPneg (drug naïve)             | -                               | 30%    | 15%   | 10%                | 15%    | 30%    |
| VBPneg (only MDD)               | -                               | 37.1%  | 11.1% | 14.8%              | 14.8%  | 22.2%  |

\*only groupings which yielded significant clusters from ALE analysis are shown

\*\*All Effects grouping is not shown as multi-modality data was pooled into shared categories

**TABLE S11. Experiment classes contributing to each cluster**

| Brain region                         | Identified from                 | % contribution to cluster |       |        |                    |      |       |
|--------------------------------------|---------------------------------|---------------------------|-------|--------|--------------------|------|-------|
|                                      |                                 | VBM                       | ALFF  | fALFF  | Glucose metabolism | rCBF | ReHo  |
| L Hippocampus                        | All Effects                     | 50%                       | 25%   | 12.5%  | 12.5%              | 0%   | 0%    |
| L Hippocampus                        | VBPpos + VBMneg (all patients)  | 66.67%                    | 0%    | 16.7%  | 16.67%             | 0%   | 0%    |
| Subgenual Cingulate                  | VBPpos + VBMneg (all patients)  | 75%                       | 25%   | 0%     | 0%                 | 0%   | 0%    |
| R Amygdala/ Putamen                  | VBPpos + VBMneg (drug naïve)    | 20%                       | 40%   | 20%    | 0%                 | 20%  | 0%    |
| L Hippocampus                        | VBPpos + VBMneg (only MDD)      | 66.67%                    | 0%    | 16.67% | 16.67%             | 0%   | 0%    |
| R Amygdala/ Putamen                  | VBPpos + VBMneg (naïve+washout) | 25%                       | 50%   | 25%    | 0%                 | 0%   | 0%    |
| L Hippocampus                        | VBPpos + VBMneg (naïve+washout) | 50%                       | 0%    | 25%    | 25%                | 0%   | 0%    |
| R Middle Occipital/ Inferior frontal | VBPneg (drug naïve)             | -                         | 33.3% | 0%     | 0%                 | 0%   | 66.7% |
| L Retrosplenial Cortex               | VBPneg (only MDD)               | -                         | 100%  | 0%     | 0%                 | 0%   | 0%    |
| R Putamen                            | VBPneg (only MDD)               | -                         | 33.3% | 33.3%  | 0%                 | 0%   | 33.3% |

**TABLE S12. List of experiments contributing to each cluster**

| Brain region                          | Identified from                 | Experiment, Imaging Modality                                                                                                                                                                                                                                                                                                                                               |
|---------------------------------------|---------------------------------|----------------------------------------------------------------------------------------------------------------------------------------------------------------------------------------------------------------------------------------------------------------------------------------------------------------------------------------------------------------------------|
| L Hippocampus                         | All Effects: All Patients       | Arnone D et al. <sup>57</sup> 2013, [VBM]<br>Germain A et al. <sup>11</sup> 2007, [FDG-PET]<br>Huang M et al. <sup>19</sup> 2017, [fALFF]<br>Lee HY et al. <sup>70</sup> 2011, [VBM]<br>Shah PJ et al. <sup>82</sup> 1998, [VBM]<br>Tadayonnejad R et al. <sup>41</sup> 2015, [ALFF]<br>Yang Y et al. <sup>50</sup> 2016, [ALFF]<br>Zou K et al. <sup>92</sup> 2010, [VBM] |
| L Hippocampus                         | VBPpos + VBMneg (all patients)  | Arnone D et al. <sup>57</sup> 2013, [VBM]<br>Germain A et al. <sup>11</sup> 2007, [FDG-PET]<br>Huang M et al. <sup>19</sup> 2017, [fALFF]<br>Lee HY et al. <sup>70</sup> 2011, [VBM]<br>Shah PJ et al. <sup>82</sup> 1998, [VBM]<br>Zou K et al. <sup>92</sup> 2010, [VBM]                                                                                                 |
| Subgenual Cingulate Gyrus             | VBPpos + VBMneg (all patients)  | Frodl T et al. <sup>63</sup> 2008, [VBM]<br>Guo WB et al. <sup>16</sup> 2012, TRD>HC, [ALFF]<br>Lee HY et al. <sup>70</sup> 2011, [VBM]<br>Machino A et al. <sup>73</sup> 2012, [VBM]                                                                                                                                                                                      |
| R Amygdala/Putamen                    | VBPpos + VBMneg (drug naïve)    | Du L et al. <sup>8</sup> 2016, [ALFF]<br>Lai CH et al. <sup>27</sup> 2015, [fALFF]<br>Liu J et al. <sup>30</sup> 2014, [ALFF]<br>Lui S et al. <sup>33</sup> 2009, [ASL]<br>Tang Y et al. <sup>85</sup> 2007, [VBM]                                                                                                                                                         |
| L Hippocampus                         | VBPpos + VBMneg (only MDD)      | Arnone D et al. <sup>57</sup> 2013, [VBM]<br>Frodl T et al. <sup>63</sup> 2008, [VBM]<br>Germain A et al. <sup>11</sup> 2007, [FDG-PET]<br>Huang M et al. <sup>19</sup> 2017, [fALFF]<br>Stratmann M et al. <sup>84</sup> 2014, [VBM]<br>Zou K et al. <sup>92</sup> 2010, [VBM]                                                                                            |
| R Amygdala/Putamen                    | VBPpos + VBMneg (naïve+washout) | Du L et al. <sup>8</sup> 2016, [ALFF]<br>Lai CH et al. <sup>27</sup> 2015, [fALFF]<br>Liu J et al. <sup>30</sup> 2014, [ALFF]<br>Tang Y et al. <sup>85</sup> 2007, [VBM]                                                                                                                                                                                                   |
| L Hippocampus                         | VBPpos + VBMneg (naïve+washout) | Arnone D et al. <sup>57</sup> 2013, [VBM]<br>Germain A et al. <sup>11</sup> 2007, [FDG-PET]<br>Huang M et al. <sup>19</sup> 2017, [fALFF]<br>Zou K et al. <sup>92</sup> 2010, [VBM]                                                                                                                                                                                        |
| R Middle Occipital/ Inferior Temporal | VBPneg (drug naïve)             | Liu J et al. <sup>30</sup> 2014, [ALFF]<br>Liu Y et al. <sup>31</sup> 2017, [ReHo]<br>Wang L et al. <sup>44</sup> 2014, [ReHo]                                                                                                                                                                                                                                             |
| L Retrosplenial Cortex                | VBPneg (only MDD)               | Fang J et al. <sup>10</sup> 2015, [ALFF]<br>Wang LJ et al. <sup>45</sup> 2014, ERD<HC, [ALFF]<br>Wang LJ et al. <sup>45</sup> 2014, END<HC, [ALFF]                                                                                                                                                                                                                         |
| R Putamen                             | VBPneg (only MDD)               | Liu Z et al. <sup>32</sup> 2010, [ReHo]<br>Shen T et al. <sup>38</sup> 2014, [fALFF]<br>Yang Y et al. <sup>50</sup> 2016, [ALFF]                                                                                                                                                                                                                                           |



## References

1. Aihara M, Ida I, Yuuki N, et al. HPA axis dysfunction in unmediated major depressive disorder and its normalization by pharmacotherapy correlates with alteration of neural activity in prefrontal cortex and limbic/paralimbic regions. *Psychiatry Res.* 2007;155(3):245-256.
2. Bonte FJ, Trivedi MH, Devous MD Sr, et al. Occipital brain perfusion deficits in children with major depressive disorder. *J Nucl Med.* 2000;42(7):1059-1061.
3. Brody AL, Saxena S, Stoessel P, et al. Regional brain metabolic changes in patients with major depression treated with either paroxetine or interpersonal therapy: preliminary findings. *Arch Gen Psychiatry.* 2001;58(7):631-640.
4. Cao J, Chen X, Chen J, et al. Resting-state functional MRI of abnormal baseline brain activity in young depressed patients with and without suicidal behavior. *J Affect Disord.* 2016;205:252-263.
5. Chen G, Bian H, Jiang D, et al. Pseudo-continuous arterial spin labeling imaging of cerebral blood perfusion asymmetry in drug-naïve patients with first-episode major depression. *Biomed Rep.* 2016;5(6):675-680.
6. Chen JD, Liu F, Xun GL, et al. Early and late onset, first-episode, treatment-naïve depression: same clinical symptoms, different regional neural activities. *J Affect Disord.* 2012;143(1-3):56-63.
7. Drevets WC, Videen TO, Price JL, Preskorn SH, Carmichael ST, Raichle ME. A functional anatomical study of unipolar depression. *J Neurosci.* 1992;12(9):3628-3641.
8. Du L, Wang J, Meng B, et al. Early life stress affects limited regional brain activity in depression. *Sci Rep.* 2016;6:25338.
9. Duhameau B, Ferré JC, Jannin P, et al. Chronic and treatment-resistant depression: a study using arterial spin labeling perfusion MRI at 3Tesla. *Psychiatry Res.* 2010;182(2):111-116.
10. Fang J, Mao N, Jiang X, Li X, Wang B, Wang Q. Functional and Anatomical Brain Abnormalities and Effects of Antidepressant in Major Depressive Disorder: Combined Application of Voxel-Based Morphometry and Amplitude of Frequency Fluctuation in Resting State. *J Comput Assist Tomogr.* 2015;39(5):766-773.
11. Germain A, Nofzinger EA, Meltzer CC, et al. Diurnal variation in regional brain glucose metabolism in depression. *Biol Psychiatry.* 2007;62(5):438-445.
12. Gong Y, Hao L, Zhang X, et al. Case-control resting-state fMRI study of brain functioning among adolescents with first-episode major depressive disorder. *Shanghai Arch Psychiatry.* 2014;26(4):207-215.
13. Guo W, Liu F, Yu M, et al. Functional and anatomical brain deficits in drug-naïve major depressive disorder. *Prog Neuropsychopharmacol Biol Psychiatry.* 2014;54:1-6.
14. Guo WB, Sun XL, Liu L, et al. Disrupted regional homogeneity in treatment-resistant depression: a resting-state fMRI study. *Prog Neuropsychopharmacol Biol Psychiatry.* 2011;35(5):1297-1302.
15. Guo WB, Liu F, Chen JD, et al. Abnormal neural activity of brain regions in treatment-resistant and treatment-sensitive major depressive disorder: a resting-state fMRI study. *J Psychiatry Res.* 2012;46(10):1366-1373.
16. Guo WB, Liu F, Xue ZM, et al. Alterations of amplitude of low-frequency fluctuations in treatment-resistant and treatment-response depression: a resting-state fMRI study. *Prog Neuropsychopharmacol Biol Psychiatry.* 2012;37(10):153-160.

17. Guo WB, Liu F, Xun GL, et al. Reversal alterations of amplitude of low-frequency fluctuations in early and late onset, first-episode, drug-naïve depression. *Prog Neuropsychopharmacol Biol Psychiatry*. 2013;40:153-159.
18. Ho TC, Wu J, Shin DD, et al. Altered cerebral perfusion in executive, affective, and motor networks during adolescent depression. *J Am Acad Child Adolesc Psychiatry*. 2013;52(10):1076-1091.
19. Huang M, Lu S, Yu L, et al. Altered fractional amplitude of low frequency fluctuation associated with cognitive dysfunction in first-episode drug-naïve major depressive disorder patients. *BMC Psychiatry*. 2017;17(1):11.
20. Ito H, Kawashima R, Awata S, et al. Hypoperfusion in the limbic system and prefrontal cortex in depression: SPECT with anatomic standardization technique. *J Nucl Med*. 1996;37(3):410-414.
21. Kaichi Y, Okada G, Takamura M, et al. Changes in the regional cerebral blood flow detected by arterial spin labeling after 6-week escitalopram treatment for major depressive disorder. *J Affect Disord*. 2016;194:135-143.
22. Kegeles LS, Malone KM, Slifstein M, et al. Response of cortical metabolic deficits to serotonergic challenge in familial mood disorders. *Am J Psychiatry*. 2003;160(1):76-82.
23. Kennedy SH, Evans KR, Krüger S, et al. Changes in regional brain glucose metabolism measured with positron emission tomography after paroxetine treatment of major depression. *Am J Psychiatry*. 2001;158(6):899-905.
24. Kimbrell TA, Ketter TA, George MS, et al. Regional cerebral glucose utilization in patients with a range of severities in unipolar depression. *Biol Psychiatry*. 2002;51(3):237-252.
25. Kohn Y, Freedman N, Lester H, et al. 99mTc-HMPAO SPECT study of cerebral perfusion after treatment with medication and electroconvulsive therapy in major depression. *J Nucl Med*. 2007;48(8):1273-1278.
26. Krausz Y, Freedman N, Lester H, et al. Brain SPECT study of common ground between hypothyroidism and depression. *Int J Neuropsychopharmacol*. 2007;10(1):99-106.
27. Lai CH, Wu YT. The patterns of fractional amplitude of low-frequency fluctuations in depression patients: the dissociation between temporal regions and fronto-parietal regions. *J Affect Disord*. 2015;175:441-445.
28. Liang MJ, Zhou Q, Yang KR, et al. Identify Changes of Brain Regional Homogeneity in Bipolar Disorder and Unipolar Depression Using Resting-State fMRI. *PLoS One*. 2013;8(12):e79999.
29. Liu CH, Ma X, Wu X, et al. Resting-state brain activity in major depressive disorder patients and their siblings. *J Affect Disord*. 2013;149(1-3):299-306.
30. Liu J, Ren L, Womer FY, et al. Alterations in amplitude of low frequency fluctuation in treatment-naïve major depressive disorder measured with resting-state fMRI. *Hum Brain Mapp*. 2014;35(10):4979-4988.
31. Liu Y, Zhao X, Cheng Z, et al. Regional homogeneity associated with overgeneral autobiographical memory of first-episode treatment-naïve patients with major depressive disorder in the orbitofrontal cortex: A resting-state fMRI study. *J Affect Disord*. 2017;209:163-168.
32. Liu Z, Xu C, Xu Y, et al. Decreased regional homogeneity in insula and cerebellum: a resting-state fMRI study in patients with major depression and subjects at high risk for major depression. *Psychiatry Res*. 2010;182(3):211-215.

33. Lui S, Parkes LM, Huang X, et al. Depressive disorders: focally altered cerebral perfusion measured with arterial spin-labeling MR imaging. *Radiology*. 2009;251(2):476-484.
34. Monkul ES, Silva LAP, Narayana S, et al. Abnormal Resting State Corticolimbic Blood Flow in Depressed Unmedicated Patients With Major Depression: A 15O-H<sub>2</sub>O PET Study. *Hum Brain Mapp*. 2012;33(2):272-279.
35. Oda K, Okubo Y, Ishida R, et al. Regional cerebral blood flow in depressed patients with white matter magnetic resonance hyperintensity. *Biol Psychiatry*. 2003;52(2):150-156.
36. Perico CA, Skaf CR, Yamada A, et al. Relationship between regional cerebral blood flow and separate symptom clusters of major depression: a single photon emission computed tomography study using statistical parametric mapping. *Neurosci Lett*. 2005;384(3):265-270.
37. Qiu H, Li X, Zhao W, et al. Electroconvulsive Therapy-Induced Brain Structural and Functional Changes in Major Depressive Disorders: A Longitudinal Study. *Med Sci Monit*. 2016;22:4577-4586.
38. Shen T, Qiu M, Li C, et al. Altered spontaneous neural activity in first-episode, unmedicated patients with major depressive disorder. *Neuroreport*. 2014;25(16):1302-1307.
39. Skaf CR, Yamada A, Garrido GE, et al. Psychotic symptoms in major depressive disorder are associated with reduced regional cerebral blood flow in the subgenual anterior cingulate cortex: a voxel-based single photon emission computed tomography (SPECT) study. *J Affect Disord*. 2002;68(2-3):295-305.
40. Smith GS, Kramer E, Ma Y, et al. The functional neuroanatomy of geriatric depression. *Int J Geriatr Psychiatry*. 2009;24(8):798-808.
41. Tadayonnejad F, Yang S, Kumar A, Ajilore O. Clinical, cognitive, and functional connectivity correlations of resting-state intrinsic brain activity alterations in unmedicated depression. *J Affect Disord*. 2015;172:241-250.
42. Vardi N, Freedman N, Lester H, et al. Hyperintensities on T2-weighted images in the basal ganglia of patients with major depression: cerebral perfusion and clinical implications. *Psychiatry Res*. 2011;192(2):125-130.
43. Wang L, Dai W, Su Y, et al. Amplitude of Low-Frequency Oscillations in First-Episode, Treatment-Naïve Patients with Major Depressive Disorder: A Resting-State Functional MRI Study. *PLoS One*. 2012;7(10):e48658.
44. Wang L, Li K, Zhang Q, et al. Short-term effects of escitalopram on regional brain function in first-episode drug-naïve patients with major depressive disorder assessed by resting-state functional magnetic resonance imaging. *Psychol Med*. 2014;44(7):1417-1426.
45. Wang LJ, Kuang WH, Xu JJ, Lei D, Yang YC. Resting-state brain activation correlates with short-time antidepressant treatment outcome in drug-naïve patients with major depressive disorder. *J Int Med Res*. 2014;42(4):966-975.
46. Wu QZ, Li DM, Kuang WH, et al. Abnormal regional spontaneous neural activity in treatment-refractory depression revealed by resting-state fMRI. *Hum Brain Mapp*. 2011;32(8):1290-1299.
47. Xue S, Wang X, Wang W, Liu J, Qiu J. Frequency-dependent alterations in regional homogeneity in major depression. *Behav Brain Res*. 2016;306:13-19.
48. Yamaura T, Okamoto Y, Okada G, et al. Association of thalamic hyperactivity with treatment-resistant depression and poor response in early treatment for major depression: a resting-state fMRI study using fractional amplitude of low-frequency fluctuations. *Transl Psychiatry*. 2016;6:e754.

49. Yang X, Ma X, Li M, et al. Anatomical and functional brain abnormalities in unmedicated major depressive disorder. *Neuropsychiatr Dis Treat.* 2015;11:2415-2423.
50. Yang Y, Zhong N, Imamura K, et al. Task and Resting-State fMRI Reveal Altered Salience Response to Positive Stimuli in Patients with Major Depressive Disorder. *PLoS One.* 2016;11(5):e0155092.
51. Yao Z, Wang L, Lu Q, Liu H, Teng G. Regional homogeneity in depression and its relationship with separate depressive symptom clusters: a resting-state fMRI study. *J Affect Disord.* 2009;115(3):430-438.
52. Yue Y, Yuan Y, Hou Z, Jiang W, Bai F, Zhang Z. Abnormal functional connectivity of amygdala in late-onset depression was associated with cognitive deficits. *PLoS One.* 2013;8(9):e75058.
53. Zhang K, Liu Z, Cao X, et al. Amplitude of low-frequency fluctuations in first-episode, drug-naïve depressive patients: A 5-year retrospective study. *PLoS One.* 2017;12(4):e0174564.
54. Zhang X, Di X, Lei H, et al. Imbalanced spontaneous brain activity in orbitofrontal-insular circuits in individuals with cognitive vulnerability to depression. *J Affect Disord.* 2016;198:56-63.
55. Zhang X, Tang Y, Maletic-Savatic M, et al. Altered neuronal spontaneous activity correlated with glutamate concentration in medial prefrontal cortex of major depressed females: An fMRI-MRS study. *J Affect Disord.* 2016;201:153-161.
56. Alemany S, Mas A, Goldberg X, et al. Regional gray matter reductions are associated with genetic liability for anxiety and depression: an MRI twin study. *J Affect Disord.* 2013;149(1-3):175-181.
57. Arnone D, McKie S, Elliott R, et al. State-dependent changes in hippocampal grey matter in depression. *Mol Psychiatry.* 2013;18(12):1265-1272.
58. Arnone D, Pegg EJ, McKie S, et al. Decreased fronto-limbic gray matter volume associated with recurrent major depressive disorder. *European Neuropsychopharmacology.* 2009;19:s371.
59. Bergouignan L, Chupin M, Czechowska Y, et al. Can voxel based morphometry, manual segmentation and automated segmentation equally detect hippocampal volume differences in acute depression? *Neuroimage.* 2009;45(1):29-37.
60. Cai Y, Liu J, Zhang L, et al. Gray matter volume abnormalities in patients with bipolar I depressive disorder and unipolar depressive disorder: a voxel-based morphometry study. *Neurosci Bull.* 2015;31(1):4-12.
61. Chaney A, Carballedo A, Amico F, et al. Effect of childhood maltreatment on brain structure in adult patients with major depressive disorder and healthy participants. *J Psychiatry Neurosci.* 2014;39(1):50-59.
62. Cheng YQ, Xu J, Chai P, et al. Brain volume alteration and the correlations with the clinical characteristics in drug-naïve first-episode MDD patients: a voxel-based morphometry study. *Neurosci Lett.* 2010;480(1):30-34.
63. Frodl TS, Koutsouleris N, Bottlender R, et al. Depression-related variation in brain morphology over 3 years: effects of stress? *Arch Gen Psychiatry.* 2008;65(10):1156-1165.
64. Gong Q, Wu Q, Scarpazza C, et al. Prognostic predication of therapeutic response in depression using high-field MR imaging. *Neuroimage.* 2011;55(4):1497-1503.
65. Grieve SM, Korgaonkar MS, Koslow SH, Gordon E, Williams LM. Widespread reductions in gray matter volume in depression. *Neuroimage Clin.* 2013;3:332-339.

66. Hwang JP, Lee TW, Tsai SJ, et al. Cortical and subcortical abnormalities in late-onset depression with history of suicide attempts investigated with MRI and voxel-based morphometry. *J Geriatr Psychiatry Neurol.* 2010;23(3):171-184.
67. Inkster B, Rao AW, Ridler K, et al. Structural brain changes in patients with recurrent major depressive disorder presenting with anxiety symptoms. *J Neuroimaging.* 2011;21(4):375-382.
68. Kim MJ, Hamilton JP, Gotlib IH. Reduced Caudate gray Matter Volume in Women with Major Depressive Disorder. *Psychiatry Res.* 2008;164(2):114-122.
69. Lai CH, Wu YT. The gray matter alterations in major depressive disorder and panic disorder: Putative differences in the pathogenesis. *J Affect Disord.* 2015;186:1-6.
70. Lee HY, Tae WS, Yoon HK, et al. Demonstration of decreased gray matter concentration in the midbrain encompassing the dorsal raphe nucleus and the limbic subcortical regions in major depressive disorder: an optimized voxel-based morphometry study. *J Affect Disord.* 2011;133(1-2):128-136.
71. Li CT, Lin CP, Chou KH, et al. Structural and cognitive deficits in remitting and non-remitting recurrent depression: a voxel-based morphometric study. *Neuroimage.* 2010;50(1):347-356.
72. Liu CH, Jing B, Ma X, et al. Voxel-based morphometry study of the insular cortex in female patients with current and remitted depression. *Neuroscience.* 2014;262:190-199.
73. Machino A, Kunisato Y, Matsumoto T, et al. Possible involvement of rumination in gray matter abnormalities in persistent symptoms of major depression: an exploratory magnetic resonance imaging voxel-based morphometry study. *J Affect Disord.* 2014;168:229-35.
74. Mak AK, Wong MM, Han SH, Lee TM. Gray matter reduction associated with emotion regulation in female outpatients with major depressive disorder: a voxel-based morphometry study. *Prog Neuropsychopharmacol Biol Psychiatry.* 2009;33(7):1184-1190.
75. Peng J, Liu J, Nie B, et al. Cerebral and cerebellar gray matter reduction in first-episode patients with major depressive disorder: a voxel-based morphometry study. *Eur J Radiol.* 2011;80(2):395-399.
76. Perico CAM, Duran FL, Zanetti MV, et al. A population-based morphometric MRI study in patients with first-episode psychotic bipolar disorder: comparison with geographically matched healthy controls and major depressive disorder subjects. *Bipolar Disord.* 2011;13(1):28-40.
77. Redlich R, Almeida JJ, Grotegerd D, et al. Brain morphometric biomarkers distinguishing unipolar and bipolar depression. A voxel-based morphometry-pattern classification approach. *JAMA Psychiatry.* 2014;71(11):1222-1230.
78. Salvatore G, Nugent AC, Lemaitre H, et al. Prefrontal cortical abnormalities in currently depressed versus currently remitted patients with major depressive disorder. *Neuroimage.* 2011;54(4):2643-2651.
79. Scheuerecker J, Meisenzahl EM, Koutsouleris N, et al. Orbitofrontal volume reductions during emotion recognition in patients with major depression. *J Psychiatry Neurosci.* 2010;35(5):311-320.
80. Serra-Blasco M, Portella MJ, Gomez-Anson B, et al. Effects of illness duration and treatment resistance on gray matter abnormalities in major depression. *Br J Psychiatry.* 2013;202:434-440.

81. Shad MU, Muddasani S, Rao U. Gray Matter Differences Between Healthy and Depressed Adolescents: A Voxel-Based Morphometry Study. *J Child Adolesc Psychopharmacol*. 2012;22(3):190-197.
82. Shah PJ, Ebmeier KP, Glabus MF, Goodwin GM. Cortical grey matter reductions associated with treatment-resistant chronic unipolar depression. Controlled magnetic resonance imaging study. *Br J Psychiatry*. 1998;172:527-532.
83. Soriano-Mas C, Hernandez-Ribas R, Pujol J, et al. Cross-sectional and longitudinal assessment of structural brain alterations in melancholic depression. *Biol Psychiatry*. 2011;69(4):318-325.
84. Stratmann M, Konrad C, Kugel H, et al. Insular and hippocampal gray matter volume reductions in patients with major depressive disorder. *PLoS One*. 2014;9(7):e102692.
85. Tang Y, Wang F, Xie G, et al. Reduced ventral anterior cingulate and amygdala volumes in medication-naïve females with major depressive disorder: A voxel-based morphometric magnetic resonance imaging study. *Psychiatry Research: Neuroimaging*. 2007;156(1):83-86.
86. van Eijndhoven P, van Wingen G, Katzenbauer M, et al. Paralimbic cortical thickness in first-episode depression: evidence for trait-related differences in mood regulation. *Am J Psychiatry*. 2013;170(12):1477-1486.
87. van Tol MJ, van der Wee NJ, van den Heuvel OA, et al. Regional brain volume in depression and anxiety disorders. *Arch Gen Psychiatry*. 2010;67(20):1002-1011.
88. van Tol MJ, Li M, Metzger CD, et al. Local cortical thinning links to resting-state disconnectivity in major depressive disorder. *Psychol Med*. 2014;44(10):2053-2065.
89. Vasic N, Walter H, Höse A, Wolf RC. Gray matter reduction associated with psychopathology and cognitive dysfunction in unipolar depression: a voxel-based morphometry study. *J Affect Disord*. 2008;109(1-2):107-116.
90. Wagner G, Koch K, Schachtzabel C, Schultz CC, Sauer H, Schlösser RG. Structural brain alterations in patients with major depressive disorder and high risk for suicide: evidence for a distinct neurobiological entity? *Neuroimage*. 2011;54(2):1607-1614.
91. Zhang X, Yao S, Zhu X, Wang x, Zhu X, Zhong M. Gray matter volume abnormalities in individuals with cognitive vulnerability to depression: A voxel-based morphometry study. *J Affect Disord*. 2012;136(3):443-452.
92. Zou K, Deng W, Li T, et al. Changes of brain morphometry in first-episode, drug-naïve, non-late-life adult patients with major depression: an optimized voxel-based morphometry study. *Biol Psychiatry*. 2010;67(2):186-188.
